# Supplementary material for: Analysis of dynamic and widespread lncRNA and miRNA expression in fetal sheep skeletal muscle
Source: PeerJ journal article supplement (doi:10.7717/peerj.9957), 2020-09-22

E90-vs-E120(Total): Top 30 GO Term

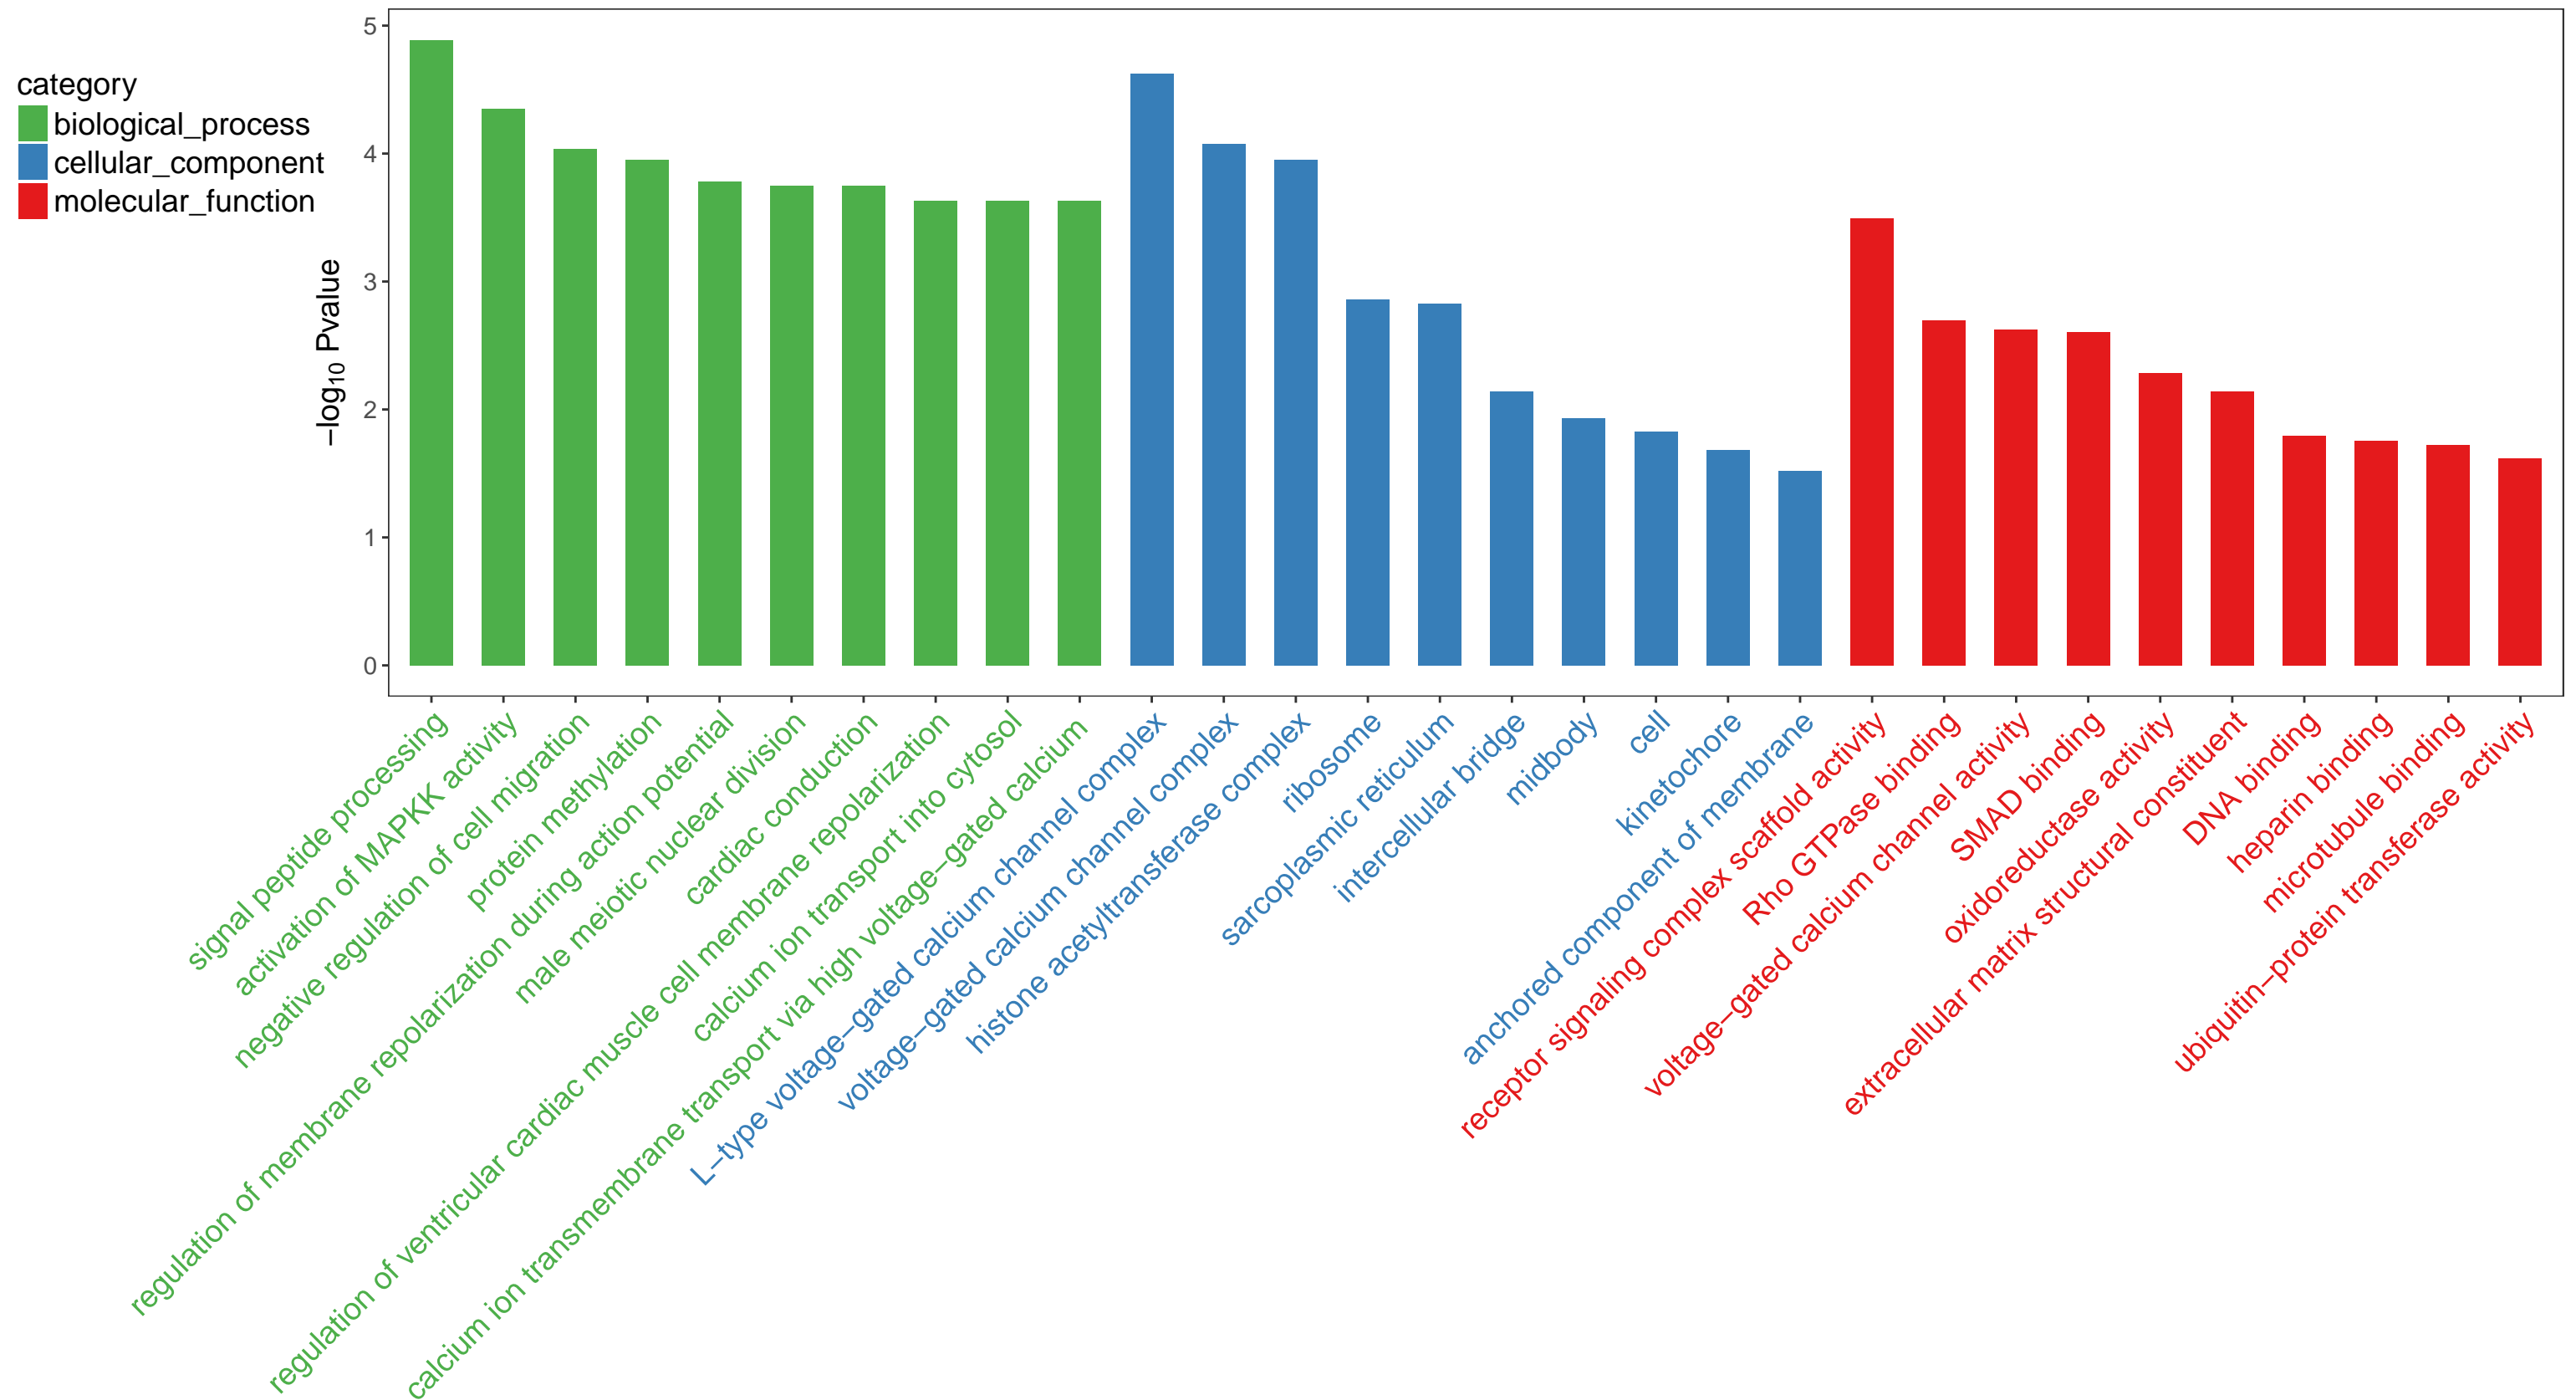

Supplement: Figure_S3.pdf [file Figure_S3.pdf]
