# Supplementary material for: Analysis of dynamic and widespread lncRNA and miRNA expression in fetal sheep skeletal muscle
Source: PeerJ journal article supplement (doi:10.7717/peerj.9957), 2020-09-22

D0-vs-D360(Total): Top 30 GO Term

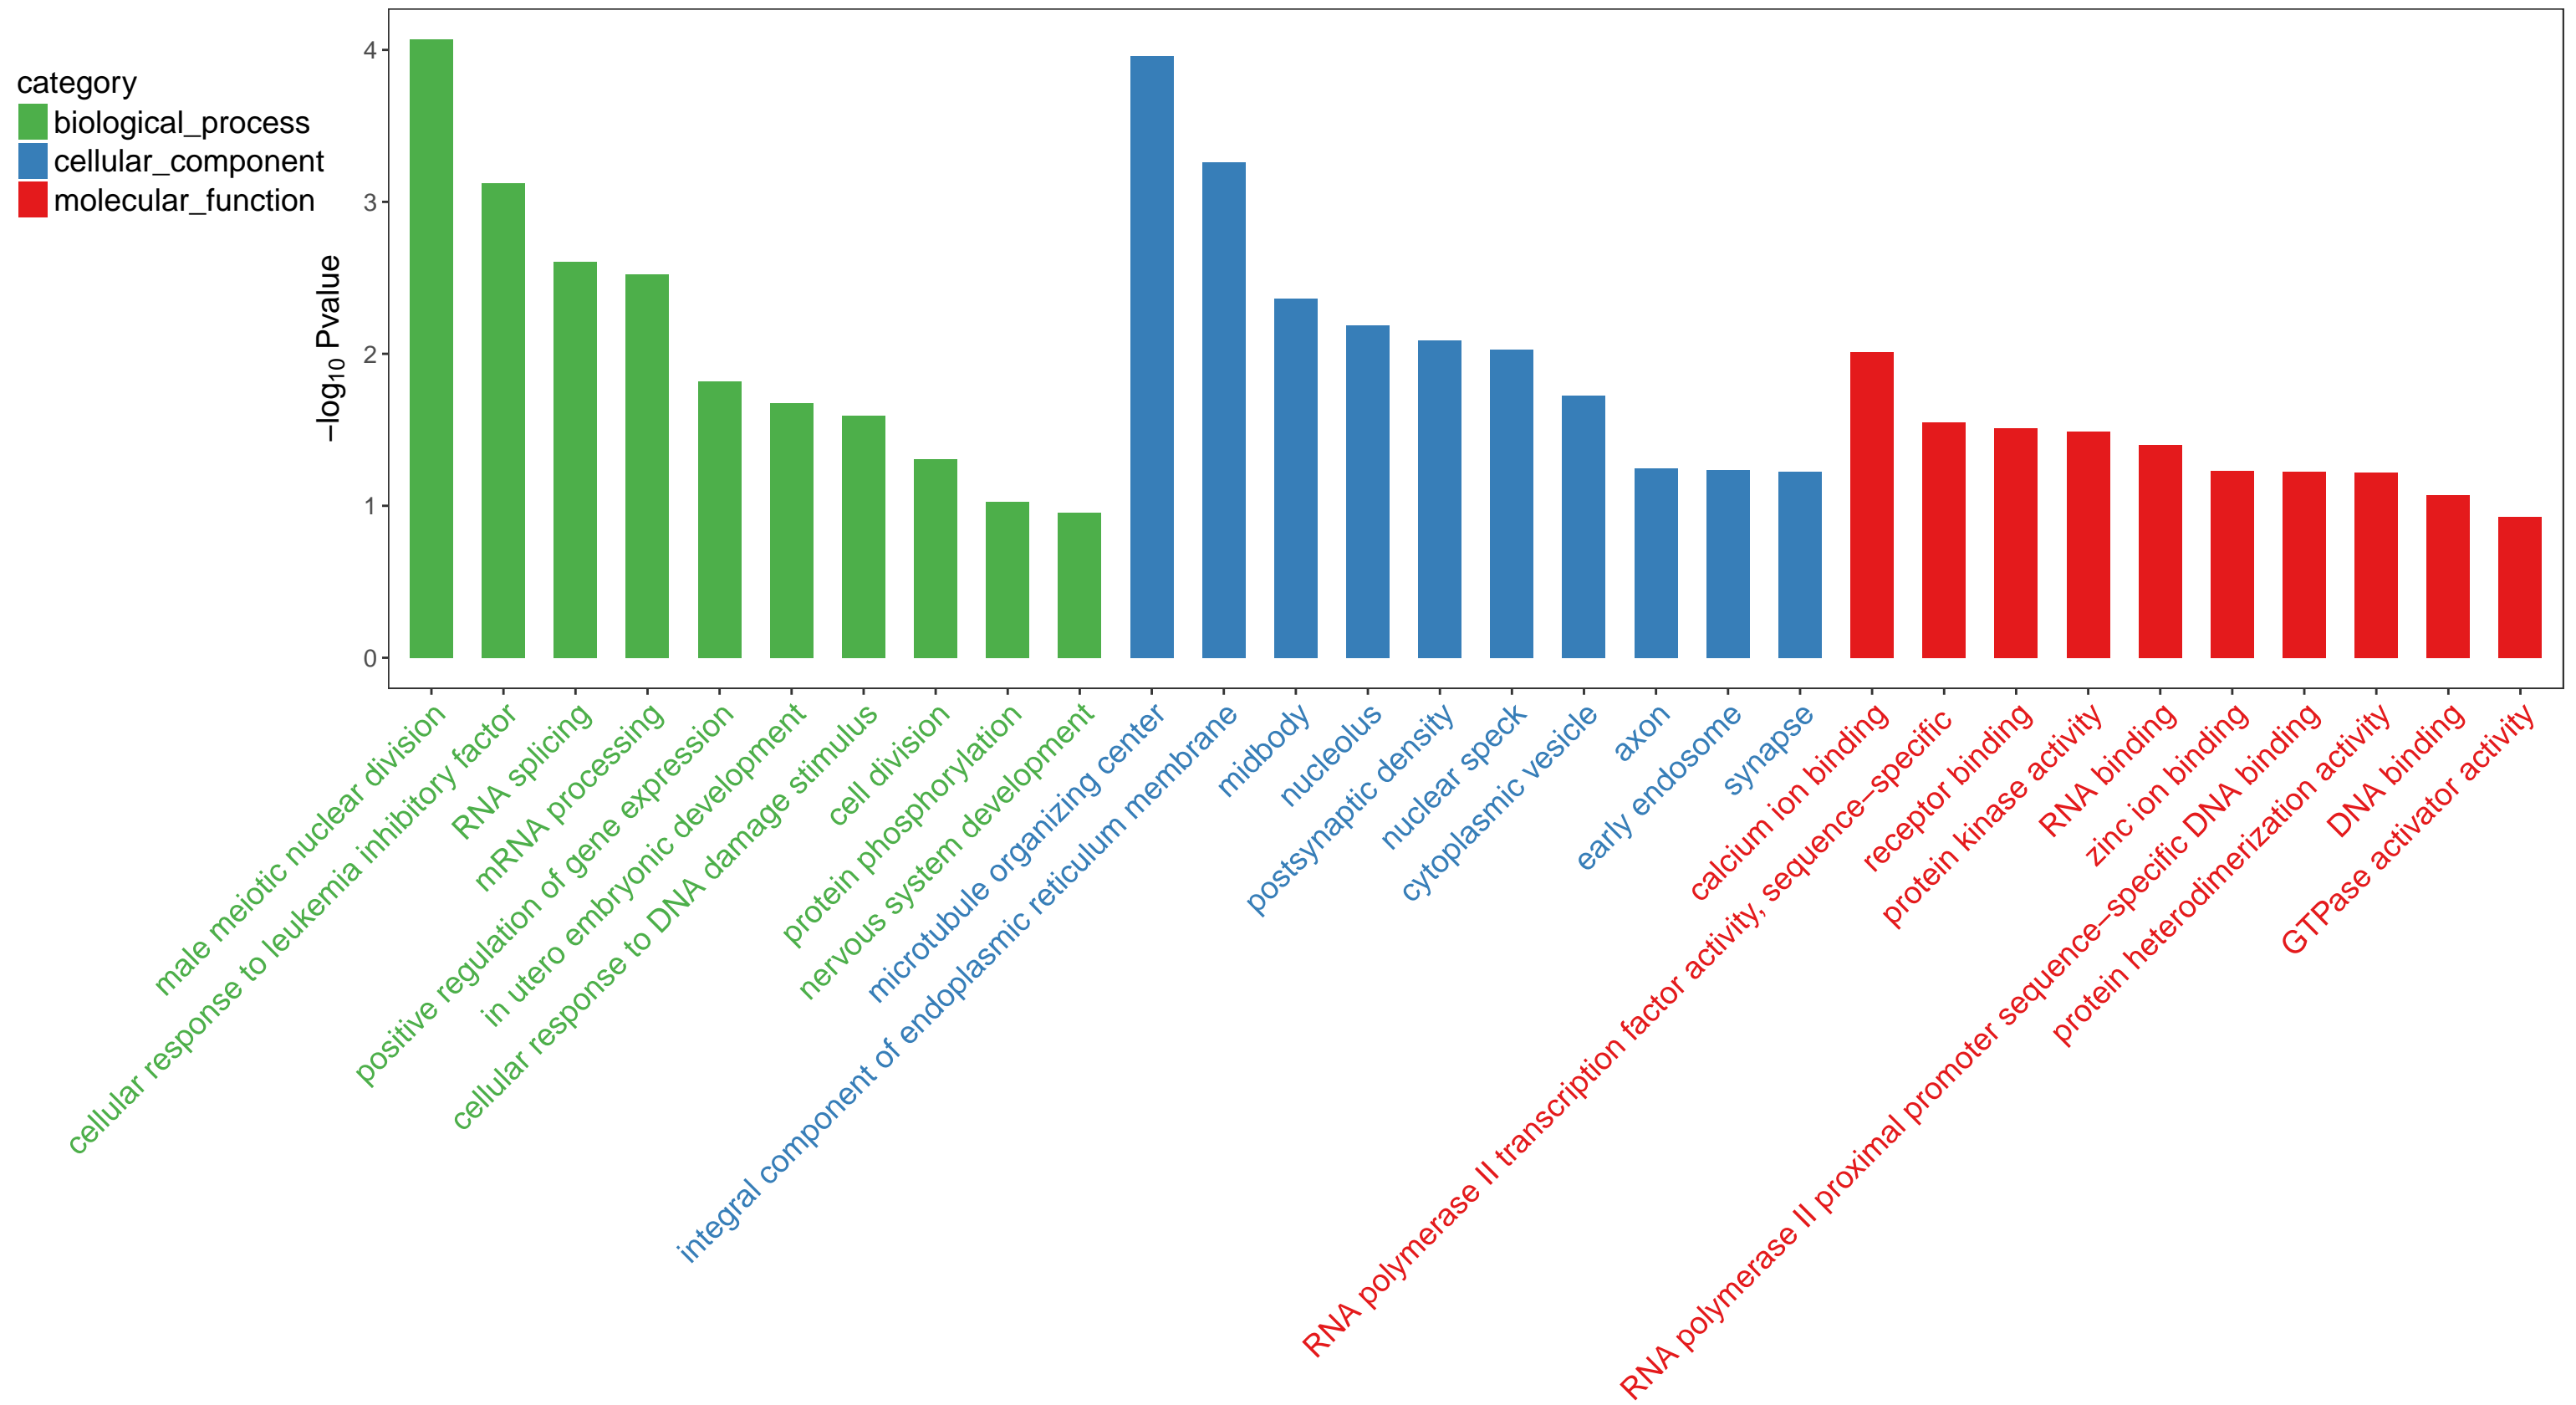

Supplement: Figure_S5.pdf [file Figure_S5.pdf]
