# Supplementary material for: Analysis of dynamic and widespread lncRNA and miRNA expression in fetal sheep skeletal muscle
Source: PeerJ journal article supplement (doi:10.7717/peerj.9957), 2020-09-22

A

## Gene Ontology Classification (E120-vs-D0)

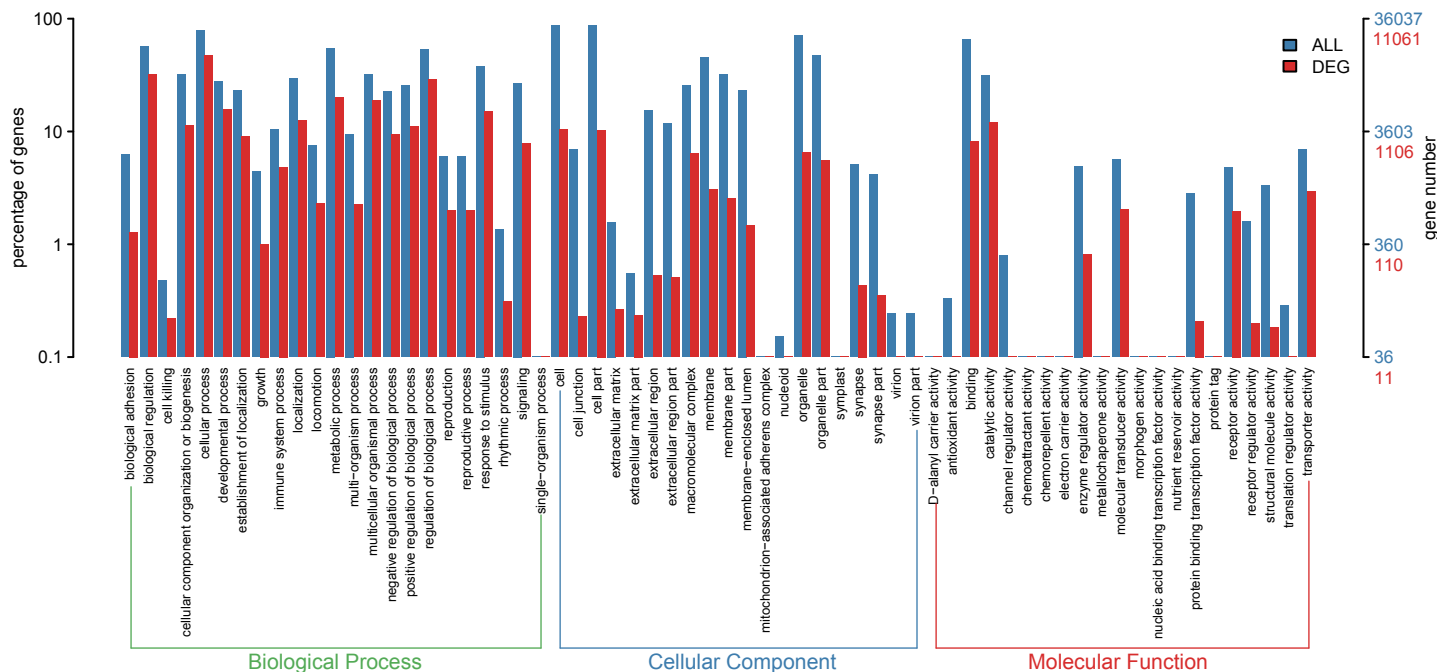

B

## Gene Ontology Classification (D0-vs-D360)

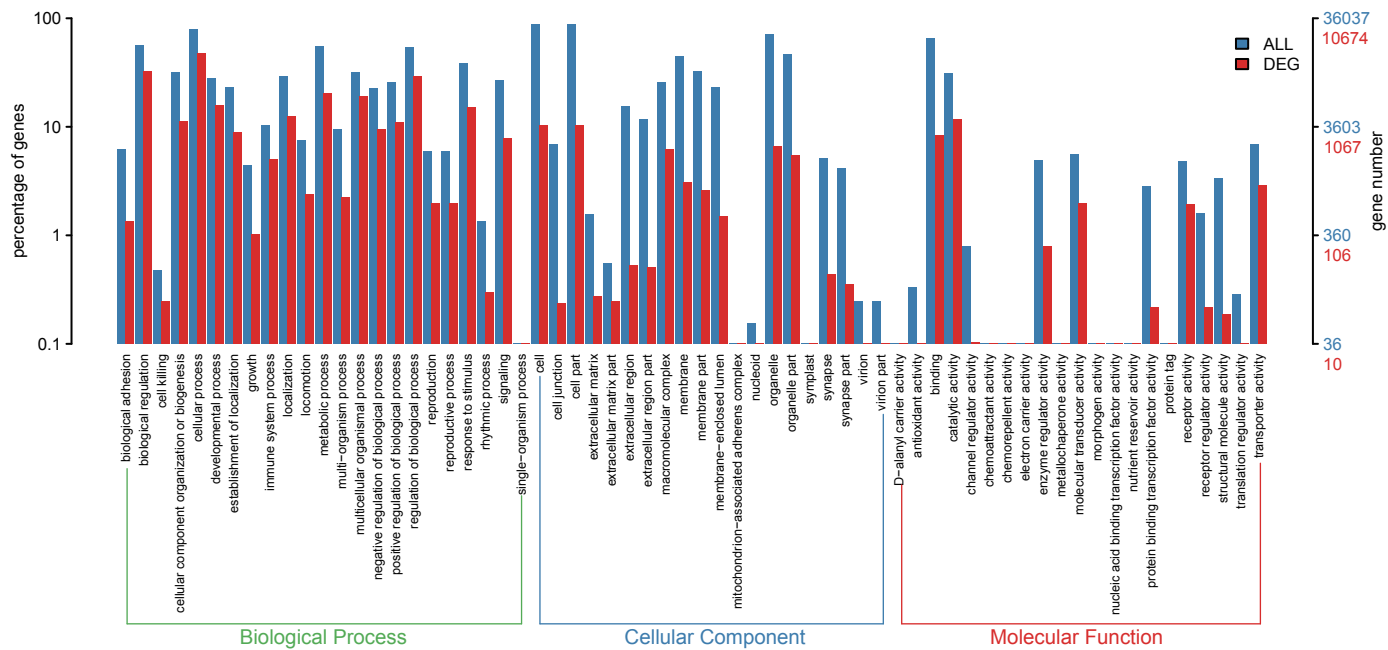

Supplement: Figure_S7.pdf [file Figure_S7.pdf]
