# Supplementary material for: Analysis of dynamic and widespread lncRNA and miRNA expression in fetal sheep skeletal muscle
Source: PeerJ. 2020 Sep 22;8:e9957. doi: 10.7717/peerj.9957 (PMC7518186; doi:10.7717/peerj.9957)
Supplement: Supplemental Information 7 [file peerj-08-9957-s007.xlsx]

## Sheet: Sheet1
Table S7 Differentially expressed lncRNAs and their corresponding target genes in E60 and E90 comparisons.
LncRNA_id	Base Mean	BaseMean_control_E90	BaseMean_case_E60	Fold Change	log2FoldChange	p val	p adj	up_down	expression_E90	expression_E60	Chrom	Start	End	Strand	partnerRNA_transcript	distance	direction	type	location	subtype	partnerRNA_gene	Dbxref	product	GO_id	GO_term	pathway	pathway_description
TCONS_00115445	359.915	718.95	0.880451	0.00122463	-9.67343	0.0263386	1	Down	69.2885	0.141551	Chr24	2479106	2522475	+	XM_012104010.2	0	sense	genic	intronic	containing	LOC105604623	GeneID:105604623,Genbank:XM_012104010.2	uncharacterized LOC105604623, transcript variant X2
TCONS_00112104	510.023	1016.52	3.5218	0.00346455	-8.17311	0.0119747	0.92281	Down	21.4418	0.0825834	Chr23	34705735	34711488	+	XM_015103634.1	0	antisense	genic	intronic	nested	MIB1	GeneID:101122068,Genbank:XM_015103634.1	mindbomb E3 ubiquitin protein ligase 1, transcript variant X3	GO:0001568,GO:0001701,GO:0001756,GO:0001841,GO:0001947,GO:0004842,GO:0005737,GO:0005813,GO:0005829,GO:0005886,GO:0006897,GO:0007219,GO:0008270,GO:0014069,GO:0031410,GO:0045665,GO:0045807	blood vessel development|in utero embryonic development|somitogenesis|neural tube formation|heart looping|ubiquitin-protein transferase activity|cytoplasm|centrosome|cytosol|plasma membrane|endocytosis|Notch signaling pathway|zinc ion binding|postsynaptic density|cytoplasmic vesicle|negative regulation of neuron differentiation|positive regulation of endocytosis
TCONS_00107545	1039.79	2071.67	7.92406	0.00382497	-8.03034	0.00056813	0.216173	Down	267.217	1.20637	Chr21	49261345	49271520	-	XM_015103258.1	0	sense	genic	intronic	containing	TALDO1	GeneID:100135441,Genbank:XM_015103258.1	transaldolase 1, transcript variant X1	GO:0004801,GO:0005737,GO:0005975,GO:0006098	sedoheptulose-7-phosphate:D-glyceraldehyde-3-phosphate glyceronetransferase activity|cytoplasm|carbohydrate metabolic process|pentose-phosphate shunt	ko01200,ko00030,ko01230	Carbon metabolism|Pentose phosphate pathway|Biosynthesis of amino acids
TCONS_00084913	610.756	1195.98	25.5331	0.0213491	-5.54968	0.0349855	1	Down	146.103	3.91771	Chr2	117919108	117922596	+	XM_012131039.1	0	sense	genic	intronic	nested	HIBCH	GeneID:101111161,Genbank:XM_012131039.1	3-hydroxyisobutyryl-CoA hydrolase, transcript variant X1	GO:0003860,GO:0005739,GO:0006574	3-hydroxyisobutyryl-CoA hydrolase activity|mitochondrion|valine catabolic process	ko01200,ko00640,ko00410,ko00280	Carbon metabolism|Propanoate metabolism|beta-Alanine metabolism|Valine, leucine and isoleucine degradation
TCONS_00189359	2901.78	5681.18	122.383	0.0215418	-5.53672	0.00011862	0.0902698	Down	722.627	19.2839	Chr9	82691108	82691346	-	XM_004011837.2	10503	antisense	intergenic	downstream	convergent	CDH17	GeneID:101111295,Genbank:XM_004011837.2	cadherin 17, LI cadherin (liver-intestine), transcript variant X1
TCONS_00150862	1267.24	2473.73	60.7511	0.0245585	-5.34763	0.00508512	0.552826	Down	267.083	8.15888	Chr4	63689888	63690231	-	XM_012176834.2	0	sense	genic	exonic	nested	LOC105606567	GeneID:105606567,Genbank:XM_012176834.2	60S ribosomal protein L39
TCONS_00016256	4157.14	8041.33	272.94	0.0339421	-4.88078	9.89298e-05	0.0894677	Down	1032.29	43.37	Chr1	199901299	199916126	-	XM_004003078.3	0	sense	genic	intronic	overlapping	MAP3K13	GeneID:101117036,Genbank:XM_004003078.3	mitogen-activated protein kinase kinase kinase 13, transcript variant X3	GO:0000186,GO:0004674,GO:0004709,GO:0005524,GO:0005737,GO:0006468,GO:0007254,GO:0016020,GO:0042803,GO:0046777,GO:0046872,GO:0051092	activation of MAPKK activity|protein serine/threonine kinase activity|MAP kinase kinase kinase activity|ATP binding|cytoplasm|protein phosphorylation|JNK cascade|membrane|protein homodimerization activity|protein autophosphorylation|metal ion binding|positive regulation of NF-kappaB transcription factor activity	ko04010	MAPK signaling pathway
TCONS_00105442	1500.38	2895.11	105.654	0.036494	-4.7762	0.0061723	0.607024	Down	330.533	14.9683	Chr21	541519	587505	-	XM_015103052.1	0	sense	genic	intronic	overlapping	CEP295	GeneID:101106980,Genbank:XM_015103052.1	centrosomal protein 295kDa, transcript variant X6	GO:0005737,GO:0005813,GO:0005814,GO:0005829,GO:0005856,GO:0005886,GO:1902117	cytoplasm|centrosome|centriole|cytosol|cytoskeleton|plasma membrane|positive regulation of organelle assembly
TCONS_00066191	2833.04	5449.48	216.591	0.0397452	-4.65307	0.000825869	0.279327	Down	699.461	34.3942	Chr17	67610146	67612924	+	XM_015101419.1	0	antisense	genic	intronic	nested	TTC28	GeneID:101119674,Genbank:XM_015101419.1	tetratricopeptide repeat domain 28, transcript variant X1	GO:0000922,GO:0005737,GO:0005815,GO:0007049,GO:0007346,GO:0019900,GO:0030496,GO:0051301	spindle pole|cytoplasm|microtubule organizing center|cell cycle|regulation of mitotic cell cycle|kinase binding|midbody|cell division
TCONS_00198330	1488.5	2824.69	152.318	0.0539238	-4.21293	0.0135123	0.940326	Down	357.617	23.9212	ChrX	130119515	130138623	-	XM_015104668.1	0	sense	genic	intronic	nested	DIAPH2	GeneID:101111608,Genbank:XM_015104668.1	diaphanous related formin 2, transcript variant X4	GO:0000910,GO:0003779,GO:0005102,GO:0005730,GO:0005769,GO:0005783,GO:0005829,GO:0007015,GO:0007275,GO:0007292,GO:0017048,GO:0043231,GO:0048477	cytokinesis|actin binding|receptor binding|nucleolus|early endosome|endoplasmic reticulum|cytosol|actin filament organization|multicellular organism development|female gamete generation|Rho GTPase binding|intracellular membrane-bounded organelle|oogenesis	ko04810	Regulation of actin cytoskeleton
TCONS_00162374	1945.88	3682.2	209.547	0.0569081	-4.13522	0.00727593	0.692123	Down	477.128	33.6007	Chr5	107647518	107712662	-	XM_015095712.1	0	antisense	genic	intronic	nested	CAMK4	GeneID:101108308,Genbank:XM_015095712.1	calcium/calmodulin-dependent protein kinase IV, transcript variant X1	GO:0001650,GO:0002250,GO:0004683,GO:0005516,GO:0005524,GO:0005634,GO:0005654,GO:0005737,GO:0005829,GO:0006468,GO:0006954,GO:0007165,GO:0007616,GO:0009931,GO:0018105,GO:0033081,GO:0035556,GO:0043011,GO:0045670,GO:0045893,GO:0046777,GO:0070062	fibrillar center|adaptive immune response|calmodulin-dependent protein kinase activity|calmodulin binding|ATP binding|nucleus|nucleoplasm|cytoplasm|cytosol|protein phosphorylation|inflammatory response|signal transduction|long-term memory|calcium-dependent protein serine/threonine kinase activity|peptidyl-serine phosphorylation|regulation of T cell differentiation in thymus|intracellular signal t…	ko04024,ko04722,ko04725,ko04380,ko04720,ko04925,ko04211,ko04020,ko04921	cAMP signaling pathway|Neurotrophin signaling pathway|Cholinergic synapse|Osteoclast differentiation|Long-term potentiation|Aldosterone synthesis and secretion|Longevity regulating pathway|Calcium signaling pathway|Oxytocin signaling pathway
TCONS_00105993	2016.82	3800.33	233.319	0.0613946	-4.02574	0.00783786	0.712192	Down	478.994	36.5133	Chr21	23829068	23919771	-	XM_004019444.3	0	sense	genic	intronic	overlapping	PRMT3	GeneID:101113707,Genbank:XM_004019444.3	protein arginine methyltransferase 3, transcript variant X1	GO:0003676,GO:0005737,GO:0005829,GO:0005840,GO:0006355,GO:0006479,GO:0008168,GO:0008469,GO:0016274,GO:0031397,GO:0035242,GO:0046872	nucleic acid binding|cytoplasm|cytosol|ribosome|regulation of transcription, DNA-templated|protein methylation|methyltransferase activity|histone-arginine N-methyltransferase activity|protein-arginine N-methyltransferase activity|negative regulation of protein ubiquitination|protein-arginine omega-N asymmetric methyltransferase activity|metal ion binding
TCONS_00107410	1088	2050.09	125.904	0.0614142	-4.02528	0.0348905	1	Down	39.0946	2.96591	Chr21	47895985	47916700	-	NM_001142510.1	29054	antisense	intergenic	downstream	convergent	CDKN1C	GeneID:100216434,Genbank:NM_001142510.1	cyclin-dependent kinase inhibitor 1C (p57, Kip2)	GO:0000122,GO:0001501,GO:0001822,GO:0001890,GO:0004861,GO:0005634,GO:0007050,GO:0007096,GO:0007568,GO:0030099,GO:0030325,GO:0035264,GO:0042326,GO:0042551,GO:0043010,GO:0055123,GO:0060065,GO:0060669,GO:0071514,GO:1902746	negative regulation of transcription from RNA polymerase II promoter|skeletal system development|kidney development|placenta development|cyclin-dependent protein serine/threonine kinase inhibitor activity|nucleus|cell cycle arrest|regulation of exit from mitosis|aging|myeloid cell differentiation|adrenal gland development|multicellular organism growth|negative regulation of phosphorylation|neuron…	ko04110	Cell cycle
TCONS_00009825	4049.14	7499.57	598.707	0.0798322	-3.64689	0.00226239	0.395168	Down	958.225	94.8449	Chr1	10529929	10548710	-	XM_004003478.2	0	antisense	genic	intronic	overlapping	AGO4	GeneID:101116530,Genbank:XM_004003478.2	argonaute 4, RISC catalytic component, transcript variant X1	GO:0000932,GO:0003725,GO:0003727,GO:0005654,GO:0005737,GO:0005829,GO:0006402,GO:0007130,GO:0007140,GO:0007223,GO:0008584,GO:0010501,GO:0010586,GO:0016020,GO:0016442,GO:0016604,GO:0022604,GO:0031054,GO:0035068,GO:0035194,GO:0035196,GO:0035198,GO:0035278,GO:0035280,GO:0043066,GO:0045652,GO:0070578	P-body|double-stranded RNA binding|single-stranded RNA binding|nucleoplasm|cytoplasm|cytosol|mRNA catabolic process|synaptonemal complex assembly|male meiotic nuclear division|Wnt signaling pathway, calcium modulating pathway|male gonad development|RNA secondary structure unwinding|miRNA metabolic process|membrane|RISC complex|nuclear body|regulation of cell morphogenesis|pre-miRNA processing|mic…
TCONS_00195408	3893.8	7198.58	589.022	0.0818247	-3.61132	0.00275029	0.398661	Down	907.273	92.0842	ChrX	40816570	40851327	-	XM_004022017.3	0	sense	genic	intronic	nested	MAOB	GeneID:101106659,Genbank:XM_004022017.3	monoamine oxidase B, transcript variant X1	GO:0005741,GO:0016021,GO:0016491	mitochondrial outer membrane|integral component of membrane|oxidoreductase activity	ko00260,ko00982,ko00380,ko00950,ko00350,ko00340,ko04728,ko00330,ko04726,ko00360	Glycine, serine and threonine metabolism|Drug metabolism - cytochrome P450|Tryptophan metabolism|Isoquinoline alkaloid biosynthesis|Tyrosine metabolism|Histidine metabolism|Dopaminergic synapse|Arginine and proline metabolism|Serotonergic synapse|Phenylalanine metabolism
TCONS_00146167	1289.46	2373.78	205.145	0.0864211	-3.53247	0.0434876	1	Down	301.863	32.3548	Chr4	41786614	41868680	+	XM_015095084.1	0	sense	genic	intronic	nested	MAGI2	GeneID:101102476,Genbank:XM_015095084.1	membrane associated guanylate kinase, WW and PDZ domain containing 2, transcript variant X1	GO:0002092,GO:0003402,GO:0004871,GO:0005634,GO:0005737,GO:0005770,GO:0005886,GO:0005923,GO:0008285,GO:0010976,GO:0014069,GO:0019902,GO:0030159,GO:0030336,GO:0030425,GO:0031697,GO:0032516,GO:0032926,GO:0036057,GO:0038180,GO:0043113,GO:0043234,GO:0045202,GO:0046332,GO:0048471,GO:0051291,GO:0051898,GO:0060395,GO:0070699,GO:0071850,GO:0072015,GO:0097118,GO:1990090,GO:2000809	positive regulation of receptor internalization|planar cell polarity pathway involved in axis elongation|signal transducer activity|nucleus|cytoplasm|late endosome|plasma membrane|bicellular tight junction|negative regulation of cell proliferation|positive regulation of neuron projection development|postsynaptic density|phosphatase binding|receptor signaling complex scaffold activity|negative reg…	ko04015,ko04530	Rap1 signaling pathway|Tight junction
TCONS_00156626	1852.73	3374.41	331.05	0.098106	-3.34952	0.0270917	1	Down	437.158	53.1092	Chr5	72382593	72432695	+	XM_012178900.2	0	sense	genic	intronic	containing	HMMR	GeneID:443128,Genbank:XM_012178900.2	hyaluronan-mediated motility receptor (RHAMM), transcript variant X1	GO:0005540,GO:0005813,GO:0005829,GO:0005886,GO:0009986,GO:0010389,GO:0015630,GO:0016020,GO:0030214	hyaluronic acid binding|centrosome|cytosol|plasma membrane|cell surface|regulation of G2/M transition of mitotic cell cycle|microtubule cytoskeleton|membrane|hyaluronan catabolic process	ko04512	ECM-receptor interaction
TCONS_00162264	2052.65	3711.73	393.562	0.106032	-3.23743	0.0260333	1	Down	474.251	62.384	Chr5	104951238	104973357	-	XM_012179033.2	0	antisense	genic	intronic	overlapping	FER	GeneID:101116052,Genbank:XM_012179033.2	fer (fps/fes related) tyrosine kinase, transcript variant X4	GO:0004715,GO:0005102,GO:0005154,GO:0005524,GO:0005634,GO:0005856,GO:0005938,GO:0006935,GO:0007155,GO:0007173,GO:0008283,GO:0008289,GO:0016477,GO:0030054,GO:0030154,GO:0030335,GO:0031234,GO:0031532,GO:0038083,GO:0038095,GO:0042058,GO:0042127,GO:0042995,GO:0043304,GO:0045087,GO:0051092	non-membrane spanning protein tyrosine kinase activity|receptor binding|epidermal growth factor receptor binding|ATP binding|nucleus|cytoskeleton|cell cortex|chemotaxis|cell adhesion|epidermal growth factor receptor signaling pathway|cell proliferation|lipid binding|cell migration|cell junction|cell differentiation|positive regulation of cell migration|extrinsic component of cytoplasmic side of p…
TCONS_00122104	7610.64	13758.9	1462.43	0.10629	-3.23392	0.00115378	0.288021	Down	1734.18	228.546	Chr25	5652044	5679579	-	XM_012104976.2	0	antisense	genic	intronic	containing	MAP10	GeneID:101114929,Genbank:XM_012104976.2	microtubule associated protein 10	GO:0005813,GO:0005881,GO:0008017,GO:0030496,GO:0031122,GO:0032467,GO:0032886,GO:0051256,GO:0051301,GO:0097431,GO:1990023	centrosome|cytoplasmic microtubule|microtubule binding|midbody|cytoplasmic microtubule organization|positive regulation of cytokinesis|regulation of microtubule-based process|mitotic spindle midzone assembly|cell division|mitotic spindle pole|mitotic spindle midzone
TCONS_00074938	1902.95	3433.47	372.431	0.108471	-3.20462	0.0317268	1	Down	436.726	58.7806	Chr19	267299	298418	+	XM_012099271.1	0	sense	genic	intronic	containing	DBNL	GeneID:101123075,Genbank:XM_012099271.1	drebrin-like, transcript variant X1	GO:0000139,GO:0001726,GO:0002102,GO:0002250,GO:0005769,GO:0005829,GO:0005886,GO:0005938,GO:0006898,GO:0007416,GO:0016601,GO:0019904,GO:0030027,GO:0030054,GO:0030665,GO:0045202,GO:0045296,GO:0048812,GO:0051015,GO:0071800,GO:0097178	Golgi membrane|ruffle|podosome|adaptive immune response|early endosome|cytosol|plasma membrane|cell cortex|receptor-mediated endocytosis|synapse assembly|Rac protein signal transduction|protein domain specific binding|lamellipodium|cell junction|clathrin-coated vesicle membrane|synapse|cadherin binding|neuron projection morphogenesis|actin filament binding|podosome assembly|ruffle assembly
TCONS_00074968	3031.59	5343.85	719.328	0.134609	-2.89316	0.021842	1	Down	692.408	115.52	Chr19	567132	649856	+	XM_012099278.2	0	antisense	genic	intronic	containing	LANCL2	GeneID:101108262,Genbank:XM_012099278.2	LanC lantibiotic synthetase component C-like 2 (bacterial), transcript variant X2	GO:0005524,GO:0005525,GO:0005634,GO:0005829,GO:0005886,GO:0009789,GO:0010314,GO:0030864,GO:0032266,GO:0045892,GO:0070273	ATP binding|GTP binding|nucleus|cytosol|plasma membrane|positive regulation of abscisic acid-activated signaling pathway|phosphatidylinositol-5-phosphate binding|cortical actin cytoskeleton|phosphatidylinositol-3-phosphate binding|negative regulation of transcription, DNA-templated|phosphatidylinositol-4-phosphate binding
TCONS_00063240	3687.63	6351.29	1023.96	0.161221	-2.63288	0.0252983	1	Down	815.316	162.988	Chr16	53126599	53203565	-	XM_012097143.2	0	antisense	genic	intronic	nested	CDH18	GeneID:101119421,Genbank:XM_012097143.2	cadherin 18, type 2, transcript variant X4	GO:0005509,GO:0005886,GO:0007156,GO:0016021	calcium ion binding|plasma membrane|homophilic cell adhesion via plasma membrane adhesion molecules|integral component of membrane
TCONS_00097570	12045.2	19462.8	4627.65	0.23777	-2.07236	0.016045	0.992502	Down	1856.61	547.197	Chr2	237781349	237782334	-	XM_004005065.3	1128	sense	intergenic	upstream	same_strand	RCC1	GeneID:101102961,Genbank:XM_004005065.3	regulator of chromosome condensation 1, transcript variant X2	GO:0000082,GO:0000790,GO:0000794,GO:0003682,GO:0005087,GO:0005634,GO:0005654,GO:0005737,GO:0007052,GO:0007059,GO:0007088,GO:0008536,GO:0016032,GO:0031491,GO:0031492,GO:0031965,GO:0042393,GO:0043199,GO:0043234,GO:0046982,GO:0051225,GO:0051290,GO:0051301	G1/S transition of mitotic cell cycle|nuclear chromatin|condensed nuclear chromosome|chromatin binding|Ran guanyl-nucleotide exchange factor activity|nucleus|nucleoplasm|cytoplasm|mitotic spindle organization|chromosome segregation|regulation of mitotic nuclear division|Ran GTPase binding|viral process|nucleosome binding|nucleosomal DNA binding|nuclear membrane|histone binding|sulfate binding|pro…
TCONS_00028127	12310.1	19872.8	4747.39	0.238889	-2.06559	0.0158994	0.992502	Down	2427.88	718.947	Chr11	9135465	9143370	-	XM_015098461.1	0	sense	genic	intronic	nested	TEX14	GeneID:101102402,Genbank:XM_015098461.1	testis expressed 14, transcript variant X6	GO:0000776,GO:0000777,GO:0004672,GO:0005524,GO:0005623,GO:0005737,GO:0007094,GO:0007140,GO:0008608,GO:0019901,GO:0030496,GO:0032091,GO:0032466,GO:0043063,GO:0045171,GO:0051301,GO:0051306,GO:1990830	kinetochore|condensed chromosome kinetochore|protein kinase activity|ATP binding|cell|cytoplasm|mitotic spindle assembly checkpoint|male meiotic nuclear division|attachment of spindle microtubules to kinetochore|protein kinase binding|midbody|negative regulation of protein binding|negative regulation of cytokinesis|intercellular bridge organization|intercellular bridge|cell division|mitotic siste…
TCONS_00030614	14064.4	22669.1	5459.68	0.240843	-2.05384	0.0137792	0.940326	Down	1570.79	468.945	Chr11	42667834	42696089	-	XM_004012962.3	7258	antisense	intergenic	upstream	divergent	ARL4D	GeneID:101109813,Genbank:XM_004012962.3	ADP ribosylation factor like GTPase 4D	GO:0005525,GO:0005730,GO:0005737,GO:0005886,GO:0007264	GTP binding|nucleolus|cytoplasm|plasma membrane|small GTPase mediated signal transduction
TCONS_00028121	83697.1	128313	39081.5	0.30458	-1.71511	0.00586924	0.607024	Down	15814.9	5970.83	Chr11	9052428	9137550	-	XM_015098462.1	0	sense	genic	exonic	nested	TEX14	GeneID:101102402,Genbank:XM_015098462.1	testis expressed 14, transcript variant X7	GO:0000776,GO:0000777,GO:0004672,GO:0005524,GO:0005623,GO:0005737,GO:0007094,GO:0007140,GO:0008608,GO:0019901,GO:0030496,GO:0032091,GO:0032466,GO:0043063,GO:0045171,GO:0051301,GO:0051306,GO:1990830	kinetochore|condensed chromosome kinetochore|protein kinase activity|ATP binding|cell|cytoplasm|mitotic spindle assembly checkpoint|male meiotic nuclear division|attachment of spindle microtubules to kinetochore|protein kinase binding|midbody|negative regulation of protein binding|negative regulation of cytokinesis|intercellular bridge organization|intercellular bridge|cell division|mitotic siste…
TCONS_00142082	37390.5	20753	54028	2.60338	1.38039	0.0454803	1	Up	2340.34	7552.61	Chr3	155079172	155155529	-	XM_012174627.2	0	sense	genic	intronic	nested	XPOT	GeneID:101111086,Genbank:XM_012174627.2	exportin, tRNA, transcript variant X3	GO:0000049,GO:0005654,GO:0005737,GO:0005829,GO:0006409,GO:0008536,GO:0016363,GO:0071528	tRNA binding|nucleoplasm|cytoplasm|cytosol|tRNA export from nucleus|Ran GTPase binding|nuclear matrix|tRNA re-export from nucleus	ko03013	RNA transport
TCONS_00196403	18744.6	7490.48	29998.7	4.00491	2.00177	0.011124	0.891093	Up	8.39349	41.6681	ChrX	62537238	62573377	-
TCONS_00196407	8327.3	2612.3	14042.3	5.37546	2.42639	0.0101245	0.856083	Up	3.13476	20.8851	ChrX	62539808	62573377	-
TCONS_00196411	2799.83	795.047	4804.62	6.04319	2.59531	0.0424404	1	Up	5.4736	40.9789	ChrX	62563131	62568181	-
TCONS_00067191	2552.27	550.854	4553.69	8.2666	3.04729	0.0230746	1	Up	64.5153	660.653	Chr17	15270299	15270630	-	XM_012097439.2	0	antisense	genic	intronic	nested	INPP4B	GeneID:101112848,Genbank:XM_012097439.2	inositol polyphosphate-4-phosphatase type II B, transcript variant X7	GO:0005623,GO:0006874,GO:0008289,GO:0016316,GO:0034593,GO:0034594,GO:0034597,GO:0045671,GO:0046822,GO:0046850,GO:0046855,GO:0046856,GO:0051896	cell|cellular calcium ion homeostasis|lipid binding|phosphatidylinositol-3,4-bisphosphate 4-phosphatase activity|phosphatidylinositol bisphosphate phosphatase activity|phosphatidylinositol trisphosphate phosphatase activity|phosphatidylinositol-4,5-bisphosphate 4-phosphatase activity|negative regulation of osteoclast differentiation|regulation of nucleocytoplasmic transport|regulation of bone rem…	ko00562,ko04070	Inositol phosphate metabolism|Phosphatidylinositol signaling system
TCONS_00136028	556.542	20.4441	1092.64	53.4453	5.73999	0.0390673	1	Up	2.33723	155.947	Chr3	223960337	223992401	+	NM_001126358.1	0	sense	genic	intronic	overlapping	RABL2B	GeneID:100145873,Genbank:NM_001126358.1	RAB, member of RAS oncogene family-like 2B	GO:0003924,GO:0005525	GTPase activity|GTP binding
TCONS_00060773	405.078	4.54313	805.613	177.326	7.47026	0.0397449	1	Up	0.0910196	21.3722	Chr16	31690173	31733033	+	XM_015101311.1	0	sense	genic	exonic	overlapping	SEPP1	GeneID:101101920,Genbank:XM_015101311.1	selenoprotein P, plasma, 1, transcript variant X1	GO:0005576	extracellular region
TCONS_00130938	743.299	5.67891	1480.92	260.775	8.02666	0.0031667	0.428419	Up	0.669761	229.338	Chr3	101977131	102029153	+	XM_012173798.1	0	sense	genic	intronic	nested	TSGA10	GeneID:101108208,Genbank:XM_012173798.1	testis specific 10, transcript variant X5	GO:0005737,GO:0007283,GO:0030031,GO:0031514,GO:0031965,GO:0043005	cytoplasm|spermatogenesis|cell projection assembly|motile cilium|nuclear membrane|neuron projection
TCONS_00123896	358.031	1.13578	714.926	629.457	9.29796	0.031805	1	Up	0.0103211	8.53175	Chr26	6445799	6507582	+	XM_015104550.1	0	sense	genic	exonic	overlapping	SPCS3	GeneID:101105386,Genbank:XM_015104550.1	signal peptidase complex subunit 3, transcript variant X1	GO:0005787,GO:0005789,GO:0006465,GO:0008233,GO:0016021,GO:0031090,GO:0045047	signal peptidase complex|endoplasmic reticulum membrane|signal peptide processing|peptidase activity|integral component of membrane|organelle membrane|protein targeting to ER	ko03060	Protein export
TCONS_00000517	283.505	0	567.01	Inf	Inf	0.0441279	1	Up	0	72.2154	Chr1	10065684	10065981	+	XM_012095418.2	0	sense	genic	intronic	nested	ZMYM4	GeneID:101115501,Genbank:XM_012095418.2	zinc finger, MYM-type 4, transcript variant X6	GO:0000981,GO:0003677,GO:0005654,GO:0005737,GO:0007010,GO:0007275,GO:0008270,GO:0022604	RNA polymerase II transcription factor activity, sequence-specific DNA binding|DNA binding|nucleoplasm|cytoplasm|cytoskeleton organization|multicellular organism development|zinc ion binding|regulation of cell morphogenesis
TCONS_00004807	298.473	0	596.946	Inf	Inf	0.0376706	1	Up	0	84.153	Chr1	122340223	122341670	+	XM_015092377.1	0	sense	genic	intronic	nested	TIAM1	GeneID:101103280,Genbank:XM_015092377.1	T-cell lymphoma invasion and metastasis 1, transcript variant X1			ko04062,ko04024,ko04015,ko04810,ko04014	Chemokine signaling pathway|cAMP signaling pathway|Rap1 signaling pathway|Regulation of actin cytoskeleton|Ras signaling pathway
TCONS_00006099	366.268	0	732.535	Inf	Inf	0.0174113	1	Up	0	111.43	Chr1	182991087	182991356	+	XM_012179771.2	0	antisense	genic	intronic	nested	GSK3B	GeneID:100169938,Genbank:XM_012179771.2	glycogen synthase kinase 3 beta, transcript variant X3			ko04722,ko04360,ko04110,ko04390,ko04340,ko04660,ko04550,ko04916,ko04728,ko04341,ko04151,ko04510,ko04310,ko04711,ko04910,ko04919,ko04917,ko04062,ko04662,ko04012,ko04150	Neurotrophin signaling pathway|Axon guidance|Cell cycle|Hippo signaling pathway|Hedgehog signaling pathway|T cell receptor signaling pathway|Signaling pathways regulating pluripotency of stem cells|Melanogenesis|Dopaminergic synapse|Hedgehog signaling pathway - fly|PI3K-Akt signaling pathway|Focal adhesion|Wnt signaling pathway|Circadian rhythm - fly|Insulin signaling pathway|Thyroid hormone sign…
TCONS_00008211	742.22	0	1484.44	Inf	Inf	0.000374016	0.178084	Up	0	228.862	Chr1	250574230	250574488	+	XM_012102945.2	0	sense	genic	intronic	nested	STAG1	GeneID:101113301,Genbank:XM_012102945.2	stromal antigen 1, transcript variant X1	GO:0000775,GO:0000785,GO:0001228,GO:0003682,GO:0005634,GO:0005654,GO:0005694,GO:0005829,GO:0007062,GO:0008278,GO:0016363,GO:0016604,GO:0051301,GO:0097431,GO:1901673	chromosome, centromeric region|chromatin|transcriptional activator activity, RNA polymerase II transcription regulatory region sequence-specific DNA binding|chromatin binding|nucleus|nucleoplasm|chromosome|cytosol|sister chromatid cohesion|cohesin complex|nuclear matrix|nuclear body|cell division|mitotic spindle pole|regulation of mitotic spindle assembly	ko04113,ko04111,ko04110	Meiosis - yeast|Cell cycle - yeast|Cell cycle
TCONS_00011353	565.69	0	1131.38	Inf	Inf	0.00185912	0.390288	Up	3.80319e-10	161.398	Chr1	49828808	49859535	-	XM_012173846.1	0	sense	genic	intronic	overlapping	LRRIQ3	GeneID:101119772,Genbank:XM_012173846.1	leucine-rich repeats and IQ motif containing 3, transcript variant X4
TCONS_00011835	309.919	0	619.837	Inf	Inf	0.0333547	1	Up	0	90.2483	Chr1	67493648	67508565	-	XM_012175897.2	0	sense	genic	exonic	overlapping	ZNF644	GeneID:101122642,Genbank:XM_012175897.2	zinc finger protein 644, transcript variant X17	GO:0003677,GO:0005634,GO:0006351,GO:0006355,GO:0046872	DNA binding|nucleus|transcription, DNA-templated|regulation of transcription, DNA-templated|metal ion binding
TCONS_00011862	505.819	0	1011.64	Inf	Inf	0.00348239	0.449962	Up	0	156.603	Chr1	68131086	68131381	-	XM_012176015.2	0	sense	genic	intronic	nested	TGFBR3	GeneID:101102437,Genbank:XM_012176015.2	transforming growth factor beta receptor III, transcript variant X1
TCONS_00012487	276.462	0	552.923	Inf	Inf	0.0476005	1	Up	0	84.1654	Chr1	90754238	90754488	-	XM_004002354.3	0	sense	genic	intronic	nested	TRIM33	GeneID:101122480,Genbank:XM_004002354.3	tripartite motif containing 33, transcript variant X2	GO:0000122,GO:0003677,GO:0004842,GO:0005634,GO:0005654,GO:0006351,GO:0008270,GO:0016567,GO:0017015,GO:0030514,GO:0045892,GO:0070410,GO:0070412	negative regulation of transcription from RNA polymerase II promoter|DNA binding|ubiquitin-protein transferase activity|nucleus|nucleoplasm|transcription, DNA-templated|zinc ion binding|protein ubiquitination|regulation of transforming growth factor beta receptor signaling pathway|negative regulation of BMP signaling pathway|negative regulation of transcription, DNA-templated|co-SMAD binding|R-SM…
TCONS_00014885	308.158	0	616.316	Inf	Inf	0.0339877	1	Up	0	87.6234	Chr1	157020932	157021233	-
TCONS_00015840	357.903	0	715.807	Inf	Inf	0.0192224	1	Up	0	103.828	Chr1	187844411	187844706	-	XM_012096005.2	0	sense	genic	intronic	nested	LOC101117035	GeneID:101117035,Genbank:XM_012096005.2	zinc finger protein 148, transcript variant X2	GO:0003677,GO:0005634,GO:0006351,GO:0006355,GO:0046872	DNA binding|nucleus|transcription, DNA-templated|regulation of transcription, DNA-templated|metal ion binding
TCONS_00016125	391.801	0	783.601	Inf	Inf	0.0130899	0.940326	Up	0	121.861	Chr1	196732015	196732326	-	XM_012097272.2	0	sense	genic	intronic	nested	LPP	GeneID:101110107,Genbank:XM_012097272.2	LIM domain containing preferred translocation partner in lipoma, transcript variant X5			ko04391	Hippo signaling pathway - fly
TCONS_00019379	277.782	0	555.565	Inf	Inf	0.0469231	1	Up	0	84.1367	Chr10	16908032	16993546	+	XM_015097972.1	0	sense	genic	intronic	nested	LRCH1	GeneID:101104584,Genbank:XM_015097972.1	leucine-rich repeats and calponin homology (CH) domain containing 1, transcript variant X1	GO:0005737,GO:0005886,GO:0007165,GO:0034260,GO:1990869,GO:2000405	cytoplasm|plasma membrane|signal transduction|negative regulation of GTPase activity|cellular response to chemokine|negative regulation of T cell migration
TCONS_00019664	568.331	0	1136.66	Inf	Inf	0.0018109	0.390288	Up	0	167.001	Chr10	23157341	23157692	+	XM_012184538.2	0	sense	genic	intronic	nested	LHFP	GeneID:101122798,Genbank:XM_012184538.2	lipoma HMGIC fusion partner, transcript variant X2
TCONS_00020400	469.28	0	938.561	Inf	Inf	0.00527582	0.563494	Up	0	136.713	Chr10	48227790	48228068	+	XM_004012186.3	0	sense	genic	intronic	nested	KLF5	GeneID:101123641,Genbank:XM_004012186.3	Kruppel-like factor 5 (intestinal), transcript variant X2
TCONS_00020781	1649.52	0	3299.05	Inf	Inf	3.61666e-07	0.000733941	Up	0	452.003	Chr10	68240865	68241192	+	XM_004012201.3	0	sense	genic	intronic	nested	GPC6	GeneID:101106600,Genbank:XM_004012201.3	glypican 6, transcript variant X1	GO:0001523,GO:0005578,GO:0005615,GO:0005634,GO:0005796,GO:0005886,GO:0005887,GO:0006024,GO:0006027,GO:0016477,GO:0030203,GO:0031225,GO:0043202,GO:0043395,GO:1904929	retinoid metabolic process|proteinaceous extracellular matrix|extracellular space|nucleus|Golgi lumen|plasma membrane|integral component of plasma membrane|glycosaminoglycan biosynthetic process|glycosaminoglycan catabolic process|cell migration|glycosaminoglycan metabolic process|anchored component of membrane|lysosomal lumen|heparan sulfate proteoglycan binding|coreceptor activity involved in W…
TCONS_00022349	503.618	0	1007.24	Inf	Inf	0.00356864	0.449962	Up	0	155.322	Chr10	34093694	34094113	-	XM_015097987.1	0	sense	genic	intronic	nested	NUP58	GeneID:101115885,Genbank:XM_015097987.1	nucleoporin 58kDa, transcript variant X1	GO:0005487,GO:0005643,GO:0006606,GO:0008139,GO:0031965,GO:0051028	nucleocytoplasmic transporter activity|nuclear pore|protein import into nucleus|nuclear localization sequence binding|nuclear membrane|mRNA transport	ko03013	RNA transport
TCONS_00024445	306.397	0	612.794	Inf	Inf	0.0346311	1	Up	0	88.5599	Chr11	16495338	16496861	+	XM_015098503.1	0	sense	genic	intronic	nested	ASIC2	GeneID:101120341,Genbank:XM_015098503.1	acid sensing ion channel 2, transcript variant X1	GO:0003026,GO:0005216,GO:0005261,GO:0005887,GO:0006812,GO:0006814,GO:0007602,GO:0007605,GO:0009612,GO:0010447,GO:0015280,GO:0016021,GO:0019229,GO:0022839,GO:0034220,GO:0034765,GO:0035418,GO:0042391,GO:0043005,GO:0043025,GO:0043066,GO:0043197,GO:0045202,GO:0050915,GO:0050974,GO:0051965	regulation of systemic arterial blood pressure by aortic arch baroreceptor feedback|ion channel activity|cation channel activity|integral component of plasma membrane|cation transport|sodium ion transport|phototransduction|sensory perception of sound|response to mechanical stimulus|response to acidic pH|ligand-gated sodium channel activity|integral component of membrane|regulation of vasoconstric…	ko04750,ko04742	Inflammatory mediator regulation of TRP channels|Taste transduction
TCONS_00024564	385.197	0	770.395	Inf	Inf	0.0140731	0.940326	Up	0	115.698	Chr11	19251591	19251879	+	XM_004012490.2	0	sense	genic	intronic	nested	NLK	GeneID:101103076,Genbank:XM_004012490.2	nemo-like kinase, transcript variant X1	GO:0000287,GO:0004672,GO:0004674,GO:0004707,GO:0005524,GO:0005634,GO:0005737,GO:0006351,GO:0006355,GO:0006468,GO:0007179,GO:0008134,GO:0016055,GO:0018107,GO:0030178,GO:0031625,GO:0035556,GO:0042169,GO:0042501,GO:0046777,GO:0050821	magnesium ion binding|protein kinase activity|protein serine/threonine kinase activity|MAP kinase activity|ATP binding|nucleus|cytoplasm|transcription, DNA-templated|regulation of transcription, DNA-templated|protein phosphorylation|transforming growth factor beta receptor signaling pathway|transcription factor binding|Wnt signaling pathway|peptidyl-threonine phosphorylation|negative regulation o…	ko04520,ko04068,ko04010,ko04310	Adherens junction|FoxO signaling pathway|MAPK signaling pathway|Wnt signaling pathway
TCONS_00036103	533.993	0	1067.99	Inf	Inf	0.00256981	0.395168	Up	0	126.711	Chr12	25512498	25512859	-	XM_012187123.2	0	sense	genic	intronic	nested	NVL	GeneID:101108847,Genbank:XM_012187123.2	nuclear VCP-like, transcript variant X2	GO:0003723,GO:0005524,GO:0005634,GO:0005654,GO:0005697,GO:0005730,GO:0016020,GO:0042254,GO:0051973,GO:1990275	RNA binding|ATP binding|nucleus|nucleoplasm|telomerase holoenzyme complex|nucleolus|membrane|ribosome biogenesis|positive regulation of telomerase activity|preribosome binding	ko03008	Ribosome biogenesis in eukaryotes
TCONS_00038389	293.19	0	586.38	Inf	Inf	0.0398319	1	Up	0	86.4921	Chr12	74086114	74087825	-	XM_015099402.1	0	sense	genic	intronic	nested	ASPM	GeneID:443284,Genbank:XM_015099402.1	abnormal spindle microtubule assembly, transcript variant X1	GO:0005516,GO:0005634,GO:0005737,GO:0005819,GO:0007051,GO:0051301	calmodulin binding|nucleus|cytoplasm|spindle|spindle organization|cell division
TCONS_00039381	359.664	0	719.328	Inf	Inf	0.0188219	1	Up	0	101.015	Chr13	14961566	14961934	+	XM_015099432.1	0	sense	genic	intronic	nested	CELF2	GeneID:101107886,Genbank:XM_015099432.1	CUGBP, Elav-like family member 2, transcript variant X1	GO:0003723,GO:0005634,GO:0005737,GO:0006376,GO:0036002	RNA binding|nucleus|cytoplasm|mRNA splice site selection|pre-mRNA binding
TCONS_00042721	276.021	0	552.043	Inf	Inf	0.0478292	1	Up	0	68.0906	Chr13	6826807	6827134	-	XM_012188135.2	0	sense	genic	intronic	nested	ESF1	GeneID:101110781,Genbank:XM_012188135.2	ESF1 nucleolar pre-rRNA processing protein homolog, transcript variant X2	GO:0003723,GO:0005615,GO:0005654,GO:0005730,GO:0006351,GO:0006355	RNA binding|extracellular space|nucleoplasm|nucleolus|transcription, DNA-templated|regulation of transcription, DNA-templated
TCONS_00046403	636.566	0	1273.13	Inf	Inf	0.000959669	0.288021	Up	0	197.1	Chr14	8692361	8692703	+	XM_012189618.2	0	sense	genic	intronic	nested	CDH13	GeneID:101123062,Genbank:XM_012189618.2	cadherin 13, transcript variant X6	GO:0005509,GO:0005886,GO:0007156,GO:0031225,GO:0042803	calcium ion binding|plasma membrane|homophilic cell adhesion via plasma membrane adhesion molecules|anchored component of membrane|protein homodimerization activity
TCONS_00051797	351.74	0	703.48	Inf	Inf	0.0206963	1	Up	0	104.652	Chr14	39383695	39384035	-	XM_012190088.2	11027	antisense	intergenic	downstream	convergent	HYDIN	GeneID:101115477,Genbank:XM_012190088.2	HYDIN, axonemal central pair apparatus protein, transcript variant X2	GO:0002064,GO:0003341,GO:0021591,GO:0060438,GO:1904158,GO:1990718	epithelial cell development|cilium movement|ventricular system development|trachea development|axonemal central apparatus assembly|axonemal central pair projection
TCONS_00054103	285.266	0	570.532	Inf	Inf	0.0433095	1	Up	0	58.0672	Chr15	13702959	13703349	+	XM_015100757.1	0	sense	genic	intronic	nested	MAML2	GeneID:101102586,Genbank:XM_015100757.1	mastermind like transcriptional coactivator 2, transcript variant X1	GO:0003713,GO:0006351,GO:0007221,GO:0016607	transcription coactivator activity|transcription, DNA-templated|positive regulation of transcription of Notch receptor target|nuclear speck	ko04330	Notch signaling pathway
TCONS_00056939	555.124	0	1110.25	Inf	Inf	0.00206725	0.395168	Up	0	144.083	Chr15	5033882	5034239	-	XM_004015967.3	0	sense	genic	intronic	nested	DYNC2H1	GeneID:101118215,Genbank:XM_004015967.3	dynein, cytoplasmic 2, heavy chain 1, transcript variant X2	GO:0003774,GO:0003777,GO:0005524,GO:0005794,GO:0005868,GO:0005874,GO:0005886,GO:0005929,GO:0005930,GO:0007030,GO:0007275,GO:0016887,GO:0031514,GO:0035721,GO:0035735,GO:0045503,GO:0045505,GO:0051959,GO:0060271,GO:0070062,GO:0097542	motor activity|microtubule motor activity|ATP binding|Golgi apparatus|cytoplasmic dynein complex|microtubule|plasma membrane|cilium|axoneme|Golgi organization|multicellular organism development|ATPase activity|motile cilium|intraciliary retrograde transport|intraciliary transport involved in cilium assembly|dynein light chain binding|dynein intermediate chain binding|dynein light intermediate cha…	ko04962,ko04145	Vasopressin-regulated water reabsorption|Phagosome
TCONS_00057089	382.556	0	765.112	Inf	Inf	0.014488	0.948417	Up	0	114.354	Chr15	9361747	9402569	-	XM_012095338.1	0	sense	genic	intronic	nested	CNTN5	GeneID:101121624,Genbank:XM_012095338.1	contactin 5, transcript variant X1	GO:0005576,GO:0005829,GO:0005886,GO:0006501,GO:0007155,GO:0007605,GO:0031225	extracellular region|cytosol|plasma membrane|C-terminal protein lipidation|cell adhesion|sensory perception of sound|anchored component of membrane
TCONS_00058961	664.74	0	1329.48	Inf	Inf	0.000755351	0.270504	Up	0	197.89	Chr15	60382160	60382586	-	XM_012096160.2	0	sense	genic	intronic	nested	IMMP1L	GeneID:101119503,Genbank:XM_012096160.2	inner mitochondrial membrane peptidase subunit 1, transcript variant X6	GO:0005739,GO:0006465,GO:0006627,GO:0008236,GO:0033108,GO:0042720	mitochondrion|signal peptide processing|protein processing involved in protein targeting to mitochondrion|serine-type peptidase activity|mitochondrial respiratory chain complex assembly|mitochondrial inner membrane peptidase complex	ko03060	Protein export
TCONS_00060475	324.886	0	649.773	Inf	Inf	0.028339	1	Up	0	90.8142	Chr16	20143335	20143601	+	XM_012097210.2	0	sense	genic	intronic	nested	LOC101108953	GeneID:101108953,Genbank:XM_012097210.2	cAMP-specific 3',5'-cyclic phosphodiesterase 4D, transcript variant X1			ko00230,ko04024	Purine metabolism|cAMP signaling pathway
TCONS_00060614	338.093	0	676.186	Inf	Inf	0.0243484	1	Up	0	97.7355	Chr16	25115735	25116081	+	XM_004016996.3	0	sense	genic	intronic	nested	ARL15	GeneID:101118640,Genbank:XM_004016996.3	ADP-ribosylation factor like GTPase 15	GO:0005525,GO:0005622,GO:0007264,GO:0070062	GTP binding|intracellular|small GTPase mediated signal transduction|extracellular exosome
TCONS_00060792	532.673	0	1065.35	Inf	Inf	0.00260569	0.395168	Up	0	157.899	Chr16	32700052	32700330	+	XM_004017014.3	0	sense	genic	intronic	nested	OXCT1	GeneID:101102177,Genbank:XM_004017014.3	3-oxoacid CoA-transferase 1, transcript variant X1	GO:0005654,GO:0005739,GO:0008260,GO:0042182,GO:0042803,GO:0046950,GO:0046952	nucleoplasm|mitochondrion|3-oxoacid CoA-transferase activity|ketone catabolic process|protein homodimerization activity|cellular ketone body metabolic process|ketone body catabolic process	ko00280,ko00072,ko00650	Valine, leucine and isoleucine degradation|Synthesis and degradation of ketone bodies|Butanoate metabolism
TCONS_00061312	285.706	0	571.413	Inf	Inf	0.0431077	1	Up	0	78.323	Chr16	56287557	56287851	+	XM_015101335.1	0	sense	genic	intronic	nested	LOC101102178	GeneID:101102178,Genbank:XM_015101335.1	unconventional myosin-X, transcript variant X1	GO:0001726,GO:0005516,GO:0005524,GO:0005547,GO:0005829,GO:0005938,GO:0007165,GO:0008360,GO:0016459,GO:0030027,GO:0030705,GO:0030898,GO:0031527,GO:0032433,GO:0051015,GO:0051489,GO:0060002	ruffle|calmodulin binding|ATP binding|phosphatidylinositol-3,4,5-trisphosphate binding|cytosol|cell cortex|signal transduction|regulation of cell shape|myosin complex|lamellipodium|cytoskeleton-dependent intracellular transport|actin-dependent ATPase activity|filopodium membrane|filopodium tip|actin filament binding|regulation of filopodium assembly|plus-end directed microfilament motor activity	ko04666	Fc gamma R-mediated phagocytosis
TCONS_00062299	324.446	0	648.892	Inf	Inf	0.0284785	1	Up	0	91.0688	Chr16	13802453	13803218	-	XM_015101270.1	0	sense	genic	intronic	nested	NLN	GeneID:101123582,Genbank:XM_015101270.1	neurolysin (metallopeptidase M3 family), transcript variant X2	GO:0004222,GO:0005758,GO:0006518,GO:0046872	metalloendopeptidase activity|mitochondrial intermembrane space|peptide metabolic process|metal ion binding	ko04614	Renin-angiotensin system
TCONS_00063128	385.197	0	770.395	Inf	Inf	0.0140731	0.940326	Up	0	116.632	Chr16	43925752	44208408	-
TCONS_00063310	294.071	0	588.141	Inf	Inf	0.0394638	1	Up	0	90.6125	Chr16	57403944	57404222	-	XM_004017143.2	0	sense	genic	intronic	nested	FBXL7	GeneID:101102932,Genbank:XM_004017143.2	F-box and leucine-rich repeat protein 7, transcript variant X1	GO:0000086,GO:0000151,GO:0000209,GO:0000278,GO:0004842,GO:0005813,GO:0005829,GO:0006511,GO:0008283,GO:0010265,GO:0010972,GO:0016567,GO:0019005,GO:0031146,GO:0043687,GO:0051301	G2/M transition of mitotic cell cycle|ubiquitin ligase complex|protein polyubiquitination|mitotic cell cycle|ubiquitin-protein transferase activity|centrosome|cytosol|ubiquitin-dependent protein catabolic process|cell proliferation|SCF complex assembly|negative regulation of G2/M transition of mitotic cell cycle|protein ubiquitination|SCF ubiquitin ligase complex|SCF-dependent proteasomal ubiquit…
TCONS_00065598	502.737	0	1005.47	Inf	Inf	0.00360383	0.449962	Up	5.30403e-37	142.223	Chr17	54500890	54515924	+	XM_015101404.1	0	sense	genic	intronic	nested	CUX2	GeneID:101105029,Genbank:XM_015101404.1	cut-like homeobox 2, transcript variant X1	GO:0000122,GO:0000139,GO:0000977,GO:0000978,GO:0001078,GO:0005634,GO:0006351,GO:0007275,GO:0007614,GO:0010628,GO:0043565,GO:0048193,GO:0050775,GO:0050890,GO:0051965,GO:0061003,GO:0070062,GO:0071310,GO:2000463	negative regulation of transcription from RNA polymerase II promoter|Golgi membrane|RNA polymerase II regulatory region sequence-specific DNA binding|RNA polymerase II proximal promoter sequence-specific DNA binding|transcriptional repressor activity, RNA polymerase II proximal promoter sequence-specific DNA binding|nucleus|transcription, DNA-templated|multicellular organism development|short-ter…
TCONS_00070734	717.567	0	1435.13	Inf	Inf	0.000471233	0.197143	Up	0	211.706	Chr18	30163061	30163384	+	XM_004017824.3	0	sense	genic	intronic	nested	UBE2Q2	GeneID:101101924,Genbank:XM_004017824.3	ubiquitin conjugating enzyme E2Q family member 2, transcript variant X3	GO:0004842,GO:0005524,GO:0005737,GO:0070936	ubiquitin-protein transferase activity|ATP binding|cytoplasm|protein K48-linked ubiquitination	ko04120	Ubiquitin mediated proteolysis
TCONS_00072491	400.605	0	801.21	Inf	Inf	0.0118773	0.92281	Up	1.90876e-16	113.894	Chr18	6013528	6018747	-	XM_012098348.2	0	sense	genic	intronic	nested	MEF2A	GeneID:101116680,Genbank:XM_012098348.2	myocyte enhancer factor 2A, transcript variant X4	GO:0000002,GO:0000122,GO:0000165,GO:0000790,GO:0000977,GO:0000978,GO:0000981,GO:0001077,GO:0001085,GO:0001105,GO:0003677,GO:0003682,GO:0003700,GO:0003705,GO:0005634,GO:0005654,GO:0005667,GO:0005829,GO:0006351,GO:0006355,GO:0006915,GO:0007399,GO:0010613,GO:0019901,GO:0033613,GO:0035035,GO:0042826,GO:0043565,GO:0045893,GO:0045944,GO:0046332,GO:0046982,GO:0048311,GO:0055005,GO:0061337,GO:0070375,GO:…	mitochondrial genome maintenance|negative regulation of transcription from RNA polymerase II promoter|MAPK cascade|nuclear chromatin|RNA polymerase II regulatory region sequence-specific DNA binding|RNA polymerase II proximal promoter sequence-specific DNA binding|RNA polymerase II transcription factor activity, sequence-specific DNA binding|transcriptional activator activity, RNA polymerase II p…	ko04022,ko04013	cGMP-PKG signaling pathway|MAPK signaling pathway - fly
TCONS_00075940	363.186	0	726.372	Inf	Inf	0.0180519	1	Up	0	106.776	Chr19	21936816	21937101	+	XM_004018312.3	5444	sense	intergenic	downstream	same_strand	SUMF1	GeneID:101110003,Genbank:XM_004018312.3	sulfatase modifying factor 1	GO:0005783,GO:0005788,GO:0016491,GO:0042803,GO:0046872	endoplasmic reticulum|endoplasmic reticulum lumen|oxidoreductase activity|protein homodimerization activity|metal ion binding	ko04142	Lysosome
TCONS_00083220	488.65	0	977.301	Inf	Inf	0.00422394	0.494526	Up	0	150.669	Chr2	58477201	58477471	+	XM_015093177.1	0	sense	genic	intronic	nested	GNAQ	GeneID:101112295,Genbank:XM_015093177.1	guanine nucleotide binding protein (G protein), q polypeptide, transcript variant X1	GO:0001508,GO:0001750,GO:0003924,GO:0004871,GO:0005096,GO:0005525,GO:0005834,GO:0007189,GO:0007213,GO:0007215,GO:0007603,GO:0009649,GO:0016020,GO:0031683,GO:0031826,GO:0031965,GO:0046872,GO:0060158	action potential|photoreceptor outer segment|GTPase activity|signal transducer activity|GTPase activator activity|GTP binding|heterotrimeric G-protein complex|adenylate cyclase-activating G-protein coupled receptor signaling pathway|G-protein coupled acetylcholine receptor signaling pathway|glutamate receptor signaling pathway|phototransduction, visible light|entrainment of circadian clock|membra…	ko04924,ko04540,ko04922,ko04015,ko04730,ko04611,ko04071,ko04916,ko04728,ko04970,ko04261,ko04925,ko04911,ko04918,ko04713,ko04724,ko04725,ko04745,ko04723,ko04270,ko04020,ko04912,ko04972,ko04022,ko04971,ko04915,ko04750,ko04720,ko04961,ko04726,ko04921	Renin secretion|Gap junction|Glucagon signaling pathway|Rap1 signaling pathway|Long-term depression|Platelet activation|Sphingolipid signaling pathway|Melanogenesis|Dopaminergic synapse|Salivary secretion|Adrenergic signaling in cardiomyocytes|Aldosterone synthesis and secretion|Insulin secretion|Thyroid hormone synthesis|Circadian entrainment|Glutamatergic synapse|Cholinergic synapse|Phototransd…
TCONS_00087550	456.514	0	913.028	Inf	Inf	0.00611823	0.607024	Up	0	140.73	Chr2	205967028	205967326	+	XM_012143323.2	0	sense	genic	intronic	nested	PARD3B	GeneID:101113827,Genbank:XM_012143323.2	par-3 family cell polarity regulator beta, transcript variant X1	GO:0005654,GO:0005923,GO:0007049,GO:0012505,GO:0016020,GO:0016604,GO:0030054,GO:0043234,GO:0051301	nucleoplasm|bicellular tight junction|cell cycle|endomembrane system|membrane|nuclear body|cell junction|protein complex|cell division
TCONS_00090678	620.718	0	1241.44	Inf	Inf	0.00110107	0.288021	Up	0	192.159	Chr2	26181704	26225094	-	XM_015092764.1	0	sense	genic	intronic	nested	AUH	GeneID:101109520,Genbank:XM_015092764.1	AU RNA binding protein/enoyl-CoA hydratase, transcript variant X1	GO:0003730,GO:0004300,GO:0004490,GO:0005739,GO:0005759,GO:0006552,GO:0006635,GO:0009083,GO:0050011	mRNA 3'-UTR binding|enoyl-CoA hydratase activity|methylglutaconyl-CoA hydratase activity|mitochondrion|mitochondrial matrix|leucine catabolic process|fatty acid beta-oxidation|branched-chain amino acid catabolic process|itaconyl-CoA hydratase activity	ko00280	Valine, leucine and isoleucine degradation
TCONS_00091673	357.903	0	715.807	Inf	Inf	0.0192224	1	Up	0	100.443	Chr2	48605653	48605982	-	XM_012120440.2	0	sense	genic	intronic	nested	COL15A1	GeneID:101102453,Genbank:XM_012120440.2	collagen, type XV, alpha 1, transcript variant X1	GO:0001525,GO:0005198,GO:0005576,GO:0005582,GO:0005615,GO:0005788,GO:0007155,GO:0007165,GO:0016021,GO:0030154,GO:0030574,GO:0031012,GO:0070062	angiogenesis|structural molecule activity|extracellular region|collagen type XV trimer|extracellular space|endoplasmic reticulum lumen|cell adhesion|signal transduction|integral component of membrane|cell differentiation|collagen catabolic process|extracellular matrix|extracellular exosome	ko04974	Protein digestion and absorption
TCONS_00092065	273.38	0	546.76	Inf	Inf	0.0492332	1	Up	0	83.8619	Chr2	58226033	58226309	-	XM_012122280.2	0	sense	genic	intronic	nested	CEP78	GeneID:101112035,Genbank:XM_012122280.2	centrosomal protein 78kDa, transcript variant X3	GO:0000086,GO:0005813,GO:0005814,GO:0005829,GO:0010389,GO:0036064,GO:0044782,GO:0097711	G2/M transition of mitotic cell cycle|centrosome|centriole|cytosol|regulation of G2/M transition of mitotic cell cycle|ciliary basal body|cilium organization|ciliary basal body-plasma membrane docking
TCONS_00095117	533.553	0	1067.11	Inf	Inf	0.0025817	0.395168	Up	0	155.468	Chr2	154066976	154067258	-	XM_012137078.1	0	sense	genic	intronic	nested	GALNT13	GeneID:101115605,Genbank:XM_012137078.1	polypeptide N-acetylgalactosaminyltransferase 13, transcript variant X5			ko00512	Mucin type O-Glycan biosynthesis
TCONS_00095845	608.392	0	1216.78	Inf	Inf	0.00123005	0.288021	Up	0	181.814	Chr2	185722915	185723183	-	XM_012140422.2	0	sense	genic	intronic	nested	CLASP1	GeneID:101114679,Genbank:XM_012140422.2	cytoplasmic linker associated protein 1, transcript variant X2	GO:0000086,GO:0000226,GO:0000776,GO:0000777,GO:0001578,GO:0002162,GO:0005794,GO:0005813,GO:0005828,GO:0005829,GO:0005876,GO:0005881,GO:0005938,GO:0006903,GO:0007020,GO:0007026,GO:0007030,GO:0007052,GO:0007062,GO:0007163,GO:0008017,GO:0010389,GO:0010458,GO:0010470,GO:0010634,GO:0010717,GO:0016020,GO:0030953,GO:0030981,GO:0031023,GO:0031111,GO:0031116,GO:0031592,GO:0034453,GO:0035371,GO:0040001,GO:…	G2/M transition of mitotic cell cycle|microtubule cytoskeleton organization|kinetochore|condensed chromosome kinetochore|microtubule bundle formation|dystroglycan binding|Golgi apparatus|centrosome|kinetochore microtubule|cytosol|spindle microtubule|cytoplasmic microtubule|cell cortex|vesicle targeting|microtubule nucleation|negative regulation of microtubule depolymerization|Golgi organization|m…
TCONS_00098395	408.529	0	817.058	Inf	Inf	0.0108613	0.891093	Up	0	123.709	Chr20	3775791	3776067	+	XM_015102569.1	0	sense	genic	intronic	nested	LOC101113020	GeneID:101113020,Genbank:XM_015102569.1	dystonin, transcript variant X1	GO:0000226,GO:0003779,GO:0005178,GO:0005509,GO:0005604,GO:0005634,GO:0005635,GO:0005737,GO:0005789,GO:0005829,GO:0005882,GO:0005925,GO:0005938,GO:0007010,GO:0007155,GO:0007229,GO:0008022,GO:0008090,GO:0009611,GO:0009925,GO:0015629,GO:0015630,GO:0016021,GO:0030011,GO:0030018,GO:0030056,GO:0030424,GO:0031252,GO:0031410,GO:0031581,GO:0031673,GO:0035371,GO:0042803,GO:0045104,GO:0045111,GO:0048870,GO:…	microtubule cytoskeleton organization|actin binding|integrin binding|calcium ion binding|basement membrane|nucleus|nuclear envelope|cytoplasm|endoplasmic reticulum membrane|cytosol|intermediate filament|focal adhesion|cell cortex|cytoskeleton organization|cell adhesion|integrin-mediated signaling pathway|protein C-terminus binding|retrograde axonal transport|response to wounding|basal plasma memb…
TCONS_00098480	338.533	0	677.067	Inf	Inf	0.0242226	1	Up	0	99.0871	Chr20	6903314	6903729	+	XM_004019162.2	17172	sense	intergenic	upstream	same_strand	KLHL31	GeneID:101114565,Genbank:XM_004019162.2	kelch like family member 31, transcript variant X1	GO:0006351,GO:0006355,GO:0031463,GO:0042787	transcription, DNA-templated|regulation of transcription, DNA-templated|Cul3-RING ubiquitin ligase complex|protein ubiquitination involved in ubiquitin-dependent protein catabolic process
TCONS_00105978	273.38	0	546.76	Inf	Inf	0.0492332	1	Up	0	81.0314	Chr21	23147031	23149096	-	XM_004019442.3	0	sense	genic	intronic	nested	NELL1	GeneID:101112858,Genbank:XM_004019442.3	neural EGFL like 1, transcript variant X2	GO:0005509,GO:0005576,GO:0005635,GO:0005737,GO:0007399,GO:0010468,GO:0030154,GO:0030501,GO:0033689,GO:0045669,GO:0048471,GO:1903363	calcium ion binding|extracellular region|nuclear envelope|cytoplasm|nervous system development|regulation of gene expression|cell differentiation|positive regulation of bone mineralization|negative regulation of osteoblast proliferation|positive regulation of osteoblast differentiation|perinuclear region of cytoplasm|negative regulation of cellular protein catabolic process
TCONS_00107976	430.981	0	861.961	Inf	Inf	0.00831925	0.734023	Up	0	125.076	Chr22	13156273	13156559	+	XM_015103326.1	0	sense	genic	intronic	nested	BTAF1	GeneID:101101938,Genbank:XM_015103326.1	B-TFIID TATA-box binding protein associated factor 1	GO:0003677,GO:0003700,GO:0004386,GO:0005524,GO:0005654,GO:0035562,GO:0043231,GO:0045892	DNA binding|DNA binding transcription factor activity|helicase activity|ATP binding|nucleoplasm|negative regulation of chromatin binding|intracellular membrane-bounded organelle|negative regulation of transcription, DNA-templated
TCONS_00108475	846.554	0	1693.11	Inf	Inf	0.000143667	0.097183	Up	0	256.337	Chr22	22564836	22565107	+	XM_004020151.3	0	sense	genic	intronic	nested	BORCS7	GeneID:101109576,Genbank:XM_004020151.3	BLOC-1 related complex subunit 7, transcript variant X1	GO:0005765,GO:0099078	lysosomal membrane|BORC complex
TCONS_00108698	455.633	0	911.267	Inf	Inf	0.00618191	0.607024	Up	0	132.818	Chr22	30523882	30552519	+	XM_015103417.1	51134	sense	intergenic	downstream	same_strand	ADRA2A	GeneID:100170317,Genbank:XM_015103417.1	adrenoceptor alpha 2A, transcript variant X1	GO:0004935,GO:0004938,GO:0005622,GO:0005887,GO:0006940,GO:0007267,GO:0019229,GO:0030168,GO:0071880	adrenergic receptor activity|alpha2-adrenergic receptor activity|intracellular|integral component of plasma membrane|regulation of smooth muscle contraction|cell-cell signaling|regulation of vasoconstriction|platelet activation|adenylate cyclase-activating adrenergic receptor signaling pathway	ko04080,ko04022	Neuroactive ligand-receptor interaction|cGMP-PKG signaling pathway
TCONS_00109670	626.441	0	1252.88	Inf	Inf	0.00104722	0.288021	Up	0	168.337	Chr22	10954000	10954303	-	XM_012102532.2	0	sense	genic	exonic	overlapping	PANK1	GeneID:101122150,Genbank:XM_012102532.2	pantothenate kinase 1, transcript variant X4	GO:0004594,GO:0005524,GO:0005634,GO:0005829,GO:0009108,GO:0015937,GO:0030118,GO:0055037,GO:0071944	pantothenate kinase activity|ATP binding|nucleus|cytosol|coenzyme biosynthetic process|coenzyme A biosynthetic process|clathrin coat|recycling endosome|cell periphery	ko00770	Pantothenate and CoA biosynthesis
TCONS_00109681	296.712	0	593.424	Inf	Inf	0.0383789	1	Up	0	89.5088	Chr22	11373178	11373789	-
TCONS_00116219	274.26	0	548.521	Inf	Inf	0.048759	1	Up	0	80.9147	Chr24	21352029	21352430	+	XM_004020841.2	0	sense	genic	intronic	nested	PLK1	GeneID:101105713,Genbank:XM_004020841.2	polo-like kinase 1, transcript variant X1	GO:0000070,GO:0000086,GO:0000122,GO:0000278,GO:0000281,GO:0000287,GO:0000776,GO:0000785,GO:0000795,GO:0000922,GO:0000942,GO:0001578,GO:0004674,GO:0005524,GO:0005634,GO:0005737,GO:0005813,GO:0005819,GO:0005876,GO:0006468,GO:0007094,GO:0007098,GO:0008017,GO:0010800,GO:0010997,GO:0016321,GO:0016567,GO:0018105,GO:0019901,GO:0030496,GO:0031648,GO:0032436,GO:0032465,GO:0042802,GO:0043066,GO:0043393,GO:…	mitotic sister chromatid segregation|G2/M transition of mitotic cell cycle|negative regulation of transcription from RNA polymerase II promoter|mitotic cell cycle|mitotic cytokinesis|magnesium ion binding|kinetochore|chromatin|synaptonemal complex|spindle pole|condensed nuclear chromosome outer kinetochore|microtubule bundle formation|protein serine/threonine kinase activity|ATP binding|nucleus|c…	ko04068,ko04914,ko04114,ko04110	FoxO signaling pathway|Progesterone-mediated oocyte maturation|Oocyte meiosis|Cell cycle
TCONS_00116384	311.239	0	622.479	Inf	Inf	0.0328867	1	Up	0	96.7618	Chr24	25331882	25332297	+	XM_015104148.1	481	antisense	intergenic	downstream	convergent	GSG1L	GeneID:101120720,Genbank:XM_015104148.1	GSG1-like, transcript variant X1	GO:0030054,GO:0099061	cell junction|integral component of postsynaptic density membrane
TCONS_00118769	305.516	0	611.033	Inf	Inf	0.034957	1	Up	0	91.6986	Chr24	25632945	25633195	-	XM_012104315.2	0	sense	genic	intronic	nested	XPO6	GeneID:101109933,Genbank:XM_012104315.2	exportin 6, transcript variant X2	GO:0005634,GO:0005730,GO:0005737,GO:0005829,GO:0005886,GO:0006611,GO:0006886,GO:0008536,GO:0008565	nucleus|nucleolus|cytoplasm|cytosol|plasma membrane|protein export from nucleus|intracellular protein transport|Ran GTPase binding|protein transporter activity
TCONS_00119684	345.137	0	690.274	Inf	Inf	0.022398	1	Up	0	100.081	Chr24	38186484	38186745	-	XM_004021057.3	0	sense	genic	intronic	nested	KDELR2	GeneID:101116624,Genbank:XM_004021057.3	KDEL endoplasmic reticulum protein retention receptor 2	GO:0005783,GO:0005789,GO:0005801,GO:0006621,GO:0015031,GO:0016021,GO:0016192,GO:0046923,GO:0070062	endoplasmic reticulum|endoplasmic reticulum membrane|cis-Golgi network|protein retention in ER lumen|protein transport|integral component of membrane|vesicle-mediated transport|ER retention sequence binding|extracellular exosome
TCONS_00120127	276.462	0	552.923	Inf	Inf	0.0476005	1	Up	0	85.2934	Chr25	964538	964863	+	XM_015104315.1	0	sense	genic	intronic	nested	URB2	GeneID:101108361,Genbank:XM_015104315.1	URB2 ribosome biogenesis 2 homolog (S. cerevisiae), transcript variant X1	GO:0005730,GO:0016235,GO:0030496,GO:0042254	nucleolus|aggresome|midbody|ribosome biogenesis
TCONS_00123610	384.317	0	768.634	Inf	Inf	0.0142099	0.940326	Up	0	114.873	Chr25	43107713	43108092	-	XM_012105539.1	0	sense	genic	intronic	nested	ERCC6	GeneID:101117559,Genbank:XM_012105539.1	excision repair cross-complementation group 6, transcript variant X2			ko03420	Nucleotide excision repair
TCONS_00125042	284.386	0	568.771	Inf	Inf	0.0437164	1	Up	0	75.2873	Chr26	35834781	35835096	+	XM_015104640.1	0	sense	genic	intronic	nested	SMIM19	GeneID:101119278,Genbank:XM_015104640.1	small integral membrane protein 19, transcript variant X2	GO:0016021	integral component of membrane
TCONS_00125164	346.898	0	693.795	Inf	Inf	0.021932	1	Up	0	96.5608	Chr26	38634118	38634417	+	XM_012106055.1	0	sense	genic	intronic	nested	TOP2B	GeneID:101103037,Genbank:XM_012106055.1	topoisomerase (DNA) II beta, transcript variant X1	GO:0000712,GO:0000819,GO:0001764,GO:0003677,GO:0003682,GO:0003918,GO:0005080,GO:0005524,GO:0005634,GO:0005654,GO:0005829,GO:0006265,GO:0007409,GO:0008022,GO:0016925,GO:0019899,GO:0030529,GO:0030900,GO:0042826,GO:0043021,GO:0044774,GO:0046872,GO:0046982	resolution of meiotic recombination intermediates|sister chromatid segregation|neuron migration|DNA binding|chromatin binding|DNA topoisomerase type II (ATP-hydrolyzing) activity|protein kinase C binding|ATP binding|nucleus|nucleoplasm|cytosol|DNA topological change|axonogenesis|protein C-terminus binding|protein sumoylation|enzyme binding|intracellular ribonucleoprotein complex|forebrain develop…
TCONS_00125445	273.82	0	547.64	Inf	Inf	0.0489953	1	Up	0	78.7547	Chr26	42841931	42842306	+	XM_012106062.2	0	sense	genic	intronic	nested	ZNF385D	GeneID:101104040,Genbank:XM_012106062.2	zinc finger protein 385D, transcript variant X1	GO:0002039,GO:0003723,GO:0005634,GO:0008270,GO:0072332	p53 binding|RNA binding|nucleus|zinc ion binding|intrinsic apoptotic signaling pathway by p53 class mediator
TCONS_00126584	476.764	0	953.528	Inf	Inf	0.00483953	0.538413	Up	0	136.613	Chr26	38824228	38824492	-	XM_004021818.3	0	sense	genic	intronic	nested	RARB	GeneID:101122663,Genbank:XM_004021818.3	retinoic acid receptor, beta, transcript variant X1	GO:0000122,GO:0000977,GO:0001657,GO:0002068,GO:0003148,GO:0003406,GO:0003417,GO:0003700,GO:0003707,GO:0003708,GO:0005634,GO:0005654,GO:0006351,GO:0008144,GO:0008270,GO:0008284,GO:0008285,GO:0021756,GO:0022008,GO:0031641,GO:0032331,GO:0032403,GO:0035116,GO:0035264,GO:0043065,GO:0043066,GO:0043068,GO:0043565,GO:0045666,GO:0045944,GO:0046965,GO:0048048,GO:0048566,GO:0055012,GO:0060041,GO:0060348,GO:…	negative regulation of transcription from RNA polymerase II promoter|RNA polymerase II regulatory region sequence-specific DNA binding|ureteric bud development|glandular epithelial cell development|outflow tract septum morphogenesis|retinal pigment epithelium development|growth plate cartilage development|DNA binding transcription factor activity|steroid hormone receptor activity|retinoic acid re…
TCONS_00127598	301.554	0	603.109	Inf	Inf	0.0364592	1	Up	0	93.8374	Chr3	10812286	10812614	+	XM_015093857.1	0	sense	genic	intronic	nested	SCAI	GeneID:101111873,Genbank:XM_015093857.1	suppressor of cancer cell invasion, transcript variant X1	GO:0003714,GO:0005634,GO:0005654,GO:0005737,GO:0006351,GO:0006355,GO:0016021,GO:0030336,GO:0031965,GO:0035024	transcription corepressor activity|nucleus|nucleoplasm|cytoplasm|transcription, DNA-templated|regulation of transcription, DNA-templated|integral component of membrane|negative regulation of cell migration|nuclear membrane|negative regulation of Rho protein signal transduction
TCONS_00128805	883.973	0	1767.95	Inf	Inf	0.00010287	0.0894677	Up	0	266.527	Chr3	38530525	38530790	+	XM_004005813.3	0	sense	genic	intronic	nested	AAK1	GeneID:101107425,Genbank:XM_004005813.3	AP2 associated kinase 1, transcript variant X1	GO:0004674,GO:0005112,GO:0005524,GO:0005905,GO:0006468,GO:0006897,GO:0019897,GO:0030136,GO:0031252,GO:0032880,GO:0035612,GO:0043195,GO:0045747,GO:0046777,GO:0050821,GO:2000369	protein serine/threonine kinase activity|Notch binding|ATP binding|clathrin-coated pit|protein phosphorylation|endocytosis|extrinsic component of plasma membrane|clathrin-coated vesicle|cell leading edge|regulation of protein localization|AP-2 adaptor complex binding|terminal bouton|positive regulation of Notch signaling pathway|protein autophosphorylation|protein stabilization|regulation of clat…
TCONS_00130255	388.719	0	777.438	Inf	Inf	0.0135398	0.940326	Up	0	100.918	Chr3	84681810	84682125	+	XM_015094420.1	0	sense	genic	intronic	nested	MAP4K3	GeneID:101118350,Genbank:XM_015094420.1	mitogen-activated protein kinase kinase kinase kinase 3, transcript variant X1	GO:0004672,GO:0004674,GO:0005524,GO:0005737,GO:0006468,GO:0007254,GO:0007346,GO:0008349,GO:0009411,GO:0034612,GO:0035556,GO:0042981	protein kinase activity|protein serine/threonine kinase activity|ATP binding|cytoplasm|protein phosphorylation|JNK cascade|regulation of mitotic cell cycle|MAP kinase kinase kinase kinase activity|response to UV|response to tumor necrosis factor|intracellular signal transduction|regulation of apoptotic process	ko04010	MAPK signaling pathway
TCONS_00130327	287.907	0	575.815	Inf	Inf	0.0421148	1	Up	0	78.9433	Chr3	86184085	86185024	+	XM_012173545.1	0	sense	genic	intronic	nested	CDC42EP3	GeneID:101120399,Genbank:XM_012173545.1	CDC42 effector protein (Rho GTPase binding) 3, transcript variant X2	GO:0005096,GO:0005519,GO:0005737,GO:0005829,GO:0005886,GO:0007165,GO:0007266,GO:0008360,GO:0012505,GO:0015629,GO:0017049,GO:0030838,GO:0031274	GTPase activator activity|cytoskeletal regulatory protein binding|cytoplasm|cytosol|plasma membrane|signal transduction|Rho protein signal transduction|regulation of cell shape|endomembrane system|actin cytoskeleton|GTP-Rho binding|positive regulation of actin filament polymerization|positive regulation of pseudopodium assembly
TCONS_00130811	476.324	0	952.648	Inf	Inf	0.00486411	0.538413	Up	4.51849e-53	129.494	Chr3	100242597	100242889	+	XM_015094488.1	0	sense	genic	intronic	nested	TBC1D8	GeneID:101103960,Genbank:XM_015094488.1	TBC1 domain family member 8, transcript variant X1	GO:0005096,GO:0005622,GO:0006886,GO:0008015,GO:0008284,GO:0012505,GO:0016020,GO:0017137,GO:0031338,GO:0090630	GTPase activator activity|intracellular|intracellular protein transport|blood circulation|positive regulation of cell proliferation|endomembrane system|membrane|Rab GTPase binding|regulation of vesicle fusion|activation of GTPase activity
TCONS_00136007	297.152	0	594.304	Inf	Inf	0.0382007	1	Up	0	83.4765	Chr3	223820945	223825641	+	XM_012175805.2	739	antisense	intergenic	upstream	divergent	CHKB	GeneID:101118779,Genbank:XM_012175805.2	choline kinase beta, transcript variant X3	GO:0004103,GO:0004305,GO:0005524,GO:0005829,GO:0006646,GO:0006656	choline kinase activity|ethanolamine kinase activity|ATP binding|cytosol|phosphatidylethanolamine biosynthetic process|phosphatidylcholine biosynthetic process	ko00564	Glycerophospholipid metabolism
TCONS_00138456	769.954	0	1539.91	Inf	Inf	0.000288102	0.159451	Up	0	232.171	Chr3	58970734	58971565	-	XM_015094355.1	0	sense	genic	intronic	nested	EIF2AK3	GeneID:101110042,Genbank:XM_015094355.1	eukaryotic translation initiation factor 2-alpha kinase 3, transcript variant X1	GO:0001501,GO:0001503,GO:0001525,GO:0002063,GO:0004672,GO:0004674,GO:0004694,GO:0005524,GO:0005737,GO:0005783,GO:0005789,GO:0006468,GO:0006919,GO:0006983,GO:0007029,GO:0010575,GO:0010628,GO:0010998,GO:0016020,GO:0017148,GO:0018105,GO:0019722,GO:0019899,GO:0019903,GO:0030176,GO:0030282,GO:0030968,GO:0031018,GO:0031642,GO:0032057,GO:0034198,GO:0034976,GO:0036492,GO:0036499,GO:0042149,GO:0042802,GO:…	skeletal system development|ossification|angiogenesis|chondrocyte development|protein kinase activity|protein serine/threonine kinase activity|eukaryotic translation initiation factor 2alpha kinase activity|ATP binding|cytoplasm|endoplasmic reticulum|endoplasmic reticulum membrane|protein phosphorylation|activation of cysteine-type endopeptidase activity involved in apoptotic process|ER overload …	ko04214,ko04210,ko04141	Apoptosis - fly|Apoptosis|Protein processing in endoplasmic reticulum
TCONS_00138633	3463.69	0	6927.39	Inf	Inf	2.0068e-11	1.22174e-07	Up	7.76258e-29	988.421	Chr3	62980641	62981679	-	XM_012170888.2	0	sense	genic	intronic	nested	PAPOLG	GeneID:101118860,Genbank:XM_012170888.2	poly(A) polymerase gamma, transcript variant X4	GO:0003723,GO:0004652,GO:0005524,GO:0005634,GO:0005654,GO:0005829,GO:0006378,GO:0016020,GO:0016604,GO:0043631,GO:0046872	RNA binding|polynucleotide adenylyltransferase activity|ATP binding|nucleus|nucleoplasm|cytosol|mRNA polyadenylation|membrane|nuclear body|RNA polyadenylation|metal ion binding	ko03015	mRNA surveillance pathway
TCONS_00139868	379.474	0	758.949	Inf	Inf	0.0149898	0.960609	Up	0	112.428	Chr3	99683852	99684154	-	XM_012173738.2	0	sense	genic	intronic	nested	MAP4K4	GeneID:101109789,Genbank:XM_012173738.2	mitogen-activated protein kinase kinase kinase kinase 4, transcript variant X16	GO:0004111,GO:0004674,GO:0005524,GO:0005737,GO:0006468,GO:0006950,GO:0007346,GO:0008349,GO:0031098,GO:0035556,GO:0042981,GO:0043066,GO:0046328,GO:0048812	creatine kinase activity|protein serine/threonine kinase activity|ATP binding|cytoplasm|protein phosphorylation|response to stress|regulation of mitotic cell cycle|MAP kinase kinase kinase kinase activity|stress-activated protein kinase signaling cascade|intracellular signal transduction|regulation of apoptotic process|negative regulation of apoptotic process|regulation of JNK cascade|neuron proj…	ko04010	MAPK signaling pathway
TCONS_00145121	445.948	0	891.897	Inf	Inf	0.0069388	0.670531	Up	0	122.659	Chr4	4677609	4680879	+	XM_015095168.1	0	sense	genic	intronic	nested	LOC101106517	GeneID:101106517,Genbank:XM_015095168.1	protein cordon-bleu, transcript variant X2	GO:0000578,GO:0001726,GO:0001757,GO:0001843,GO:0001889,GO:0003785,GO:0005884,GO:0005886,GO:0005938,GO:0030041,GO:0030424,GO:0030425,GO:0030903,GO:0033504,GO:0043025,GO:0044294,GO:0044295,GO:0048471,GO:0048565,GO:0048669,GO:0051639,GO:1900006,GO:1900029	embryonic axis specification|ruffle|somite specification|neural tube closure|liver development|actin monomer binding|actin filament|plasma membrane|cell cortex|actin filament polymerization|axon|dendrite|notochord development|floor plate development|neuronal cell body|dendritic growth cone|axonal growth cone|perinuclear region of cytoplasm|digestive tract development|collateral sprouting in absen…
TCONS_00146095	305.076	0	610.152	Inf	Inf	0.035121	1	Up	0	82.3284	Chr4	38199015	38199319	+	XM_015095243.1	0	sense	genic	intronic	nested	CACNA2D1	GeneID:101123550,Genbank:XM_015095243.1	calcium channel, voltage-dependent, alpha 2/delta subunit 1, transcript variant X1	GO:0005245,GO:0005886,GO:0005891,GO:0006816,GO:0016529,GO:0046872,GO:0051924,GO:0060307,GO:0060402,GO:0061337,GO:0061577,GO:0070062,GO:0086002,GO:0086048,GO:0086091,GO:0098703,GO:0098903,GO:1901843,GO:1902514,GO:1904646,GO:1990454	voltage-gated calcium channel activity|plasma membrane|voltage-gated calcium channel complex|calcium ion transport|sarcoplasmic reticulum|metal ion binding|regulation of calcium ion transport|regulation of ventricular cardiac muscle cell membrane repolarization|calcium ion transport into cytosol|cardiac conduction|calcium ion transmembrane transport via high voltage-gated calcium channel|extracel…	ko04010,ko04261,ko04921,ko04260	MAPK signaling pathway|Adrenergic signaling in cardiomyocytes|Oxytocin signaling pathway|Cardiac muscle contraction
TCONS_00148010	438.465	0	876.929	Inf	Inf	0.00759655	0.711504	Up	9.59779e-41	101.274	Chr4	94291194	94292630	+	XM_015095386.1	0	antisense	genic	intronic	nested	COPG2	GeneID:101117839,Genbank:XM_015095386.1	coatomer protein complex subunit gamma 2, transcript variant X2	GO:0000139,GO:0005198,GO:0005829,GO:0006886,GO:0006891,GO:0030126	Golgi membrane|structural molecule activity|cytosol|intracellular protein transport|intra-Golgi vesicle-mediated transport|COPI vesicle coat
TCONS_00149316	356.583	0	713.165	Inf	Inf	0.0195288	1	Up	0	107.572	Chr4	9716574	9716836	-	XM_015095185.1	0	sense	genic	intronic	nested	PEX1	GeneID:101114102,Genbank:XM_015095185.1	peroxisomal biogenesis factor 1, transcript variant X2			ko04146	Peroxisome
TCONS_00149980	372.871	0	745.742	Inf	Inf	0.0161396	0.992502	Up	0	102.623	Chr4	31990684	31990985	-	XM_012176512.2	0	sense	genic	intronic	nested	IGF2BP3	GeneID:101110498,Genbank:XM_012176512.2	insulin like growth factor 2 mRNA binding protein 3, transcript variant X1	GO:0003723,GO:0003730,GO:0005634,GO:0005737,GO:0005829,GO:0006412,GO:0009653,GO:0017148,GO:0042035,GO:0043488,GO:0045182,GO:0048027,GO:0051028	RNA binding|mRNA 3'-UTR binding|nucleus|cytoplasm|cytosol|translation|anatomical structure morphogenesis|negative regulation of translation|regulation of cytokine biosynthetic process|regulation of mRNA stability|translation regulator activity|mRNA 5'-UTR binding|mRNA transport
TCONS_00150238	353.941	0	707.883	Inf	Inf	0.0201571	1	Up	0	88.2872	Chr4	43628396	43628694	-	XM_004007817.3	0	sense	genic	intronic	nested	PTPN12	GeneID:101117497,Genbank:XM_004007817.3	protein tyrosine phosphatase, non-receptor type 12, transcript variant X1	GO:0002102,GO:0004721,GO:0004725,GO:0004726,GO:0005654,GO:0005737,GO:0005829,GO:0005925,GO:0006470,GO:0017124,GO:0035335,GO:0038128,GO:0042058,GO:0042246,GO:0042995,GO:0071345,GO:0071364,GO:1901185,GO:2000587	podosome|phosphoprotein phosphatase activity|protein tyrosine phosphatase activity|non-membrane spanning protein tyrosine phosphatase activity|nucleoplasm|cytoplasm|cytosol|focal adhesion|protein dephosphorylation|SH3 domain binding|peptidyl-tyrosine dephosphorylation|ERBB2 signaling pathway|regulation of epidermal growth factor receptor signaling pathway|tissue regeneration|cell projection|cellu…
TCONS_00152073	412.051	0	824.102	Inf	Inf	0.0104285	0.869712	Up	0	114.267	Chr4	101392515	101392823	-	XM_015095119.1	0	sense	genic	intronic	nested	CREB3L2	GeneID:101108743,Genbank:XM_015095119.1	cAMP responsive element binding protein 3-like 2, transcript variant X1	GO:0002062,GO:0003700,GO:0005634,GO:0005783,GO:0005789,GO:0006351,GO:0016021,GO:0030968,GO:0034976,GO:0035497,GO:0044212,GO:0045944,GO:0051216	chondrocyte differentiation|DNA binding transcription factor activity|nucleus|endoplasmic reticulum|endoplasmic reticulum membrane|transcription, DNA-templated|integral component of membrane|endoplasmic reticulum unfolded protein response|response to endoplasmic reticulum stress|cAMP response element binding|transcription regulatory region DNA binding|positive regulation of transcription from RNA…	ko04922,ko04211,ko04962,ko04916,ko04728,ko04668,ko04261,ko04925,ko04911,ko04151,ko04918,ko04024,ko04725,ko04152,ko04022,ko04915	Glucagon signaling pathway|Longevity regulating pathway|Vasopressin-regulated water reabsorption|Melanogenesis|Dopaminergic synapse|TNF signaling pathway|Adrenergic signaling in cardiomyocytes|Aldosterone synthesis and secretion|Insulin secretion|PI3K-Akt signaling pathway|Thyroid hormone synthesis|cAMP signaling pathway|Cholinergic synapse|AMPK signaling pathway|cGMP-PKG signaling pathway|Estrog…
TCONS_00155862	339.414	0	678.828	Inf	Inf	0.0239724	1	Up	0	86.4336	Chr5	51243105	51243418	+	XM_012178663.2	0	sense	genic	intronic	nested	ARHGAP26	GeneID:101109966,Genbank:XM_012178663.2	Rho GTPase activating protein 26, transcript variant X3
TCONS_00157758	291.429	0	582.858	Inf	Inf	0.0405782	1	Up	0	88.7188	Chr5	2154007	2154279	-	XM_012177622.2	0	sense	genic	intronic	nested	LOC101123551	GeneID:101123551,Genbank:XM_012177622.2	zinc finger protein 2 homolog, transcript variant X27	GO:0003677,GO:0003700,GO:0005634,GO:0006351,GO:0006355,GO:0046872	DNA binding|DNA binding transcription factor activity|nucleus|transcription, DNA-templated|regulation of transcription, DNA-templated|metal ion binding
TCONS_00158027	295.391	0	590.783	Inf	Inf	0.0389178	1	Up	0	90.6995	Chr5	4665428	4672881	-	XM_004008420.2	0	antisense	genic	intronic	overlapping	LOC101109268	GeneID:101109268,Genbank:XM_004008420.2	putative protein TPRXL, transcript variant X1
TCONS_00159703	385.637	0	771.275	Inf	Inf	0.0140053	0.940326	Up	0	117.348	Chr5	30740081	30740327	-	XM_015095955.1	0	sense	genic	intronic	nested	PRR16	GeneID:101113754,Genbank:XM_015095955.1	proline rich 16, transcript variant X1	GO:0045727,GO:0045793	positive regulation of translation|positive regulation of cell size
TCONS_00159913	282.625	0	565.249	Inf	Inf	0.044544	1	Up	0	86.8012	Chr5	36733802	36734064	-	XM_012178327.2	0	sense	genic	intronic	nested	PHYKPL	GeneID:101108046,Genbank:XM_012178327.2	5-phosphohydroxy-L-lysine phospho-lyase, transcript variant X3	GO:0005739,GO:0005759,GO:0006554,GO:0008453,GO:0016829,GO:0030170,GO:0030574,GO:0042802	mitochondrion|mitochondrial matrix|lysine catabolic process|alanine-glyoxylate transaminase activity|lyase activity|pyridoxal phosphate binding|collagen catabolic process|identical protein binding	ko00310	Lysine degradation
TCONS_00161558	524.309	0	1048.62	Inf	Inf	0.00284719	0.403108	Up	0	159.454	Chr5	78772797	78773884	-	XM_015096180.1	0	sense	genic	intronic	nested	SSBP2	GeneID:101118446,Genbank:XM_015096180.1	single-stranded DNA binding protein 2, transcript variant X1	GO:0000978,GO:0001077,GO:0003697,GO:0005634,GO:0005737,GO:0006355,GO:0045944	RNA polymerase II proximal promoter sequence-specific DNA binding|transcriptional activator activity, RNA polymerase II proximal promoter sequence-specific DNA binding|single-stranded DNA binding|nucleus|cytoplasm|regulation of transcription, DNA-templated|positive regulation of transcription from RNA polymerase II promoter
TCONS_00161916	1365.14	0	2730.28	Inf	Inf	2.55116e-06	0.00388286	Up	0	411.662	Chr5	91605340	91620328	-	XM_012178956.2	0	sense	genic	intronic	nested	MCTP1	GeneID:101122523,Genbank:XM_012178956.2	multiple C2 domains, transmembrane 1, transcript variant X2	GO:0005509,GO:0005783,GO:0005789,GO:0016021,GO:0019722,GO:0030054,GO:0030336,GO:0030672,GO:0045806,GO:0046928,GO:0048168,GO:0055037,GO:1902883	calcium ion binding|endoplasmic reticulum|endoplasmic reticulum membrane|integral component of membrane|calcium-mediated signaling|cell junction|negative regulation of cell migration|synaptic vesicle membrane|negative regulation of endocytosis|regulation of neurotransmitter secretion|regulation of neuronal synaptic plasticity|recycling endosome|negative regulation of response to oxidative stress
TCONS_00161926	537.956	0	1075.91	Inf	Inf	0.00246558	0.395168	Up	0	143.399	Chr5	91768140	91768445	-	XM_012178960.2	0	sense	genic	intronic	nested	MCTP1	GeneID:101122523,Genbank:XM_012178960.2	multiple C2 domains, transmembrane 1, transcript variant X13	GO:0005509,GO:0005783,GO:0005789,GO:0016021,GO:0019722,GO:0030054,GO:0030336,GO:0030672,GO:0045806,GO:0046928,GO:0048168,GO:0055037,GO:1902883	calcium ion binding|endoplasmic reticulum|endoplasmic reticulum membrane|integral component of membrane|calcium-mediated signaling|cell junction|negative regulation of cell migration|synaptic vesicle membrane|negative regulation of endocytosis|regulation of neurotransmitter secretion|regulation of neuronal synaptic plasticity|recycling endosome|negative regulation of response to oxidative stress
TCONS_00162715	2144.34	0	4288.68	Inf	Inf	1.65821e-08	5.0476e-05	Up	0	356.804	Chr6	13030659	13071360	+	XM_012179483.2	0	antisense	genic	intronic	overlapping	LARP7	GeneID:101116230,Genbank:XM_012179483.2	La ribonucleoprotein domain family member 7, transcript variant X3	GO:0003723,GO:0005654,GO:0005829,GO:0006396,GO:0030529	RNA binding|nucleoplasm|cytosol|RNA processing|intracellular ribonucleoprotein complex
TCONS_00164405	551.162	0	1102.32	Inf	Inf	0.0021521	0.395168	Up	0	151.087	Chr6	77503120	77503428	+	XM_015096263.1	569	sense	intergenic	downstream	same_strand	ADGRL3	GeneID:101111884,Genbank:XM_015096263.1	adhesion G protein-coupled receptor L3, transcript variant X8	GO:0001764,GO:0004930,GO:0005509,GO:0005887,GO:0005911,GO:0007166,GO:0007416,GO:0030246,GO:0030424,GO:0098742	neuron migration|G-protein coupled receptor activity|calcium ion binding|integral component of plasma membrane|cell-cell junction|cell surface receptor signaling pathway|synapse assembly|carbohydrate binding|axon|cell-cell adhesion via plasma-membrane adhesion molecules
TCONS_00165009	357.463	0	714.926	Inf	Inf	0.0193239	1	Up	0	104.548	Chr6	100132827	100133137	+	XM_012180292.2	0	sense	genic	intronic	nested	ARHGAP24	GeneID:101119904,Genbank:XM_012180292.2	Rho GTPase activating protein 24, transcript variant X2	GO:0001525,GO:0005096,GO:0005829,GO:0005856,GO:0005925,GO:0007165,GO:0030154,GO:0042995,GO:0051056	angiogenesis|GTPase activator activity|cytosol|cytoskeleton|focal adhesion|signal transduction|cell differentiation|cell projection|regulation of small GTPase mediated signal transduction
TCONS_00165374	283.065	0	566.13	Inf	Inf	0.0443354	1	Up	0	77.5151	Chr6	114020169	114020471	+	XM_015096304.1	0	sense	genic	intronic	nested	TRMT44	GeneID:101120164,Genbank:XM_015096304.1	tRNA methyltransferase 44 homolog (S. cerevisiae), transcript variant X1	GO:0005737,GO:0016300,GO:0030488,GO:0046872	cytoplasm|tRNA (uracil) methyltransferase activity|tRNA methylation|metal ion binding
TCONS_00167962	338.093	0	676.186	Inf	Inf	0.0243484	1	Up	0	98.0594	Chr6	81007778	81008108	-	XM_015096530.1	0	sense	genic	intronic	nested	EPHA5	GeneID:101119989,Genbank:XM_015096530.1	EPH receptor A5, transcript variant X8	GO:0005003,GO:0005004,GO:0005005,GO:0005524,GO:0005791,GO:0005886,GO:0005887,GO:0007411,GO:0009897,GO:0019933,GO:0021766,GO:0030424,GO:0030425,GO:0032793,GO:0032956,GO:0043025,GO:0043087,GO:0048013,GO:0048471,GO:0048666,GO:0061178	ephrin receptor activity|GPI-linked ephrin receptor activity|transmembrane-ephrin receptor activity|ATP binding|rough endoplasmic reticulum|plasma membrane|integral component of plasma membrane|axon guidance|external side of plasma membrane|cAMP-mediated signaling|hippocampus development|axon|dendrite|positive regulation of CREB transcription factor activity|regulation of actin cytoskeleton organ…	ko04360	Axon guidance
TCONS_00168372	311.239	0	622.479	Inf	Inf	0.0328867	1	Up	0	92.6608	Chr6	94181888	94183918	-	XM_004009939.3	0	sense	genic	intronic	nested	ANTXR2	GeneID:101113070,Genbank:XM_004009939.3	anthrax toxin receptor 2	GO:0004872,GO:0005576,GO:0005789,GO:0005886,GO:0009897,GO:0010008,GO:0016021,GO:0022414,GO:0046872,GO:1901998	receptor activity|extracellular region|endoplasmic reticulum membrane|plasma membrane|external side of plasma membrane|endosome membrane|integral component of membrane|reproductive process|metal ion binding|toxin transport
TCONS_00171458	344.697	0	689.393	Inf	Inf	0.0225159	1	Up	0	101.28	Chr7	46080489	46080760	+	XM_015096689.1	0	sense	genic	intronic	nested	RORA	GeneID:101102986,Genbank:XM_015096689.1	RAR-related orphan receptor A, transcript variant X1	GO:0000977,GO:0001046,GO:0001222,GO:0001223,GO:0001228,GO:0001525,GO:0003677,GO:0003700,GO:0003707,GO:0004879,GO:0005634,GO:0005654,GO:0006355,GO:0006367,GO:0006805,GO:0006809,GO:0008013,GO:0008134,GO:0008142,GO:0008270,GO:0008589,GO:0010575,GO:0010906,GO:0019218,GO:0019221,GO:0021702,GO:0021930,GO:0030522,GO:0032922,GO:0036315,GO:0042692,GO:0042753,GO:0043030,GO:0043124,GO:0043565,GO:0045599,GO:…	RNA polymerase II regulatory region sequence-specific DNA binding|core promoter sequence-specific DNA binding|transcription corepressor binding|transcription coactivator binding|transcriptional activator activity, RNA polymerase II transcription regulatory region sequence-specific DNA binding|angiogenesis|DNA binding|DNA binding transcription factor activity|steroid hormone receptor activity|nucl…	ko04710	Circadian rhythm
TCONS_00175914	610.152	0	1220.3	Inf	Inf	0.00121041	0.288021	Up	0	179.336	Chr7	53261993	53262278	-	XM_012181518.2	0	sense	genic	intronic	nested	UNC13C	GeneID:101123470,Genbank:XM_012181518.2	unc-13 homolog C (C. elegans), transcript variant X3	GO:0005509,GO:0005543,GO:0005737,GO:0005886,GO:0007268,GO:0016079,GO:0019992,GO:0030054,GO:0031914,GO:0035556,GO:0042734,GO:0043195,GO:0044305,GO:0048786	calcium ion binding|phospholipid binding|cytoplasm|plasma membrane|chemical synaptic transmission|synaptic vesicle exocytosis|diacylglycerol binding|cell junction|negative regulation of synaptic plasticity|intracellular signal transduction|presynaptic membrane|terminal bouton|calyx of Held|presynaptic active zone	ko04721	Synaptic vesicle cycle
TCONS_00177833	403.687	0	807.373	Inf	Inf	0.0114747	0.907247	Up	0	103.197	Chr8	10184941	10185253	+	XM_015097312.1	0	sense	genic	exonic	nested	DOPEY1	GeneID:101114709,Genbank:XM_015097312.1	dopey family member 1, transcript variant X7	GO:0005768,GO:0005802,GO:0005829,GO:0006895,GO:0015031	endosome|trans-Golgi network|cytosol|Golgi to endosome transport|protein transport
TCONS_00180911	288.348	0	576.695	Inf	Inf	0.0419193	1	Up	0	89.2952	Chr8	10140607	10168426	-	XM_015097312.1	0	antisense	genic	exonic	nested	DOPEY1	GeneID:101114709,Genbank:XM_015097312.1	dopey family member 1, transcript variant X7	GO:0005768,GO:0005802,GO:0005829,GO:0006895,GO:0015031	endosome|trans-Golgi network|cytosol|Golgi to endosome transport|protein transport
TCONS_00181330	371.11	0	742.22	Inf	Inf	0.0164657	1	Up	0	109.53	Chr8	19882397	19882666	-	XM_004011167.3	0	sense	genic	intronic	nested	SLC35F1	GeneID:101102315,Genbank:XM_004011167.3	solute carrier family 35 member F1, transcript variant X1	GO:0016021,GO:0022857	integral component of membrane|transmembrane transporter activity
TCONS_00181331	406.768	0	813.537	Inf	Inf	0.0110818	0.891093	Up	0	96.815	Chr8	19949919	19950250	-	XM_004011167.3	0	sense	genic	intronic	nested	SLC35F1	GeneID:101102315,Genbank:XM_004011167.3	solute carrier family 35 member F1, transcript variant X1	GO:0016021,GO:0022857	integral component of membrane|transmembrane transporter activity
TCONS_00181687	304.196	0	608.392	Inf	Inf	0.0354511	1	Up	0	91.7072	Chr8	29627227	29627511	-	XM_015097362.1	0	sense	genic	intronic	nested	SOBP	GeneID:101108923,Genbank:XM_015097362.1	sine oculis binding protein homolog, transcript variant X1	GO:0046872	metal ion binding
TCONS_00182260	533.113	0	1066.23	Inf	Inf	0.00259367	0.395168	Up	0	165.806	Chr8	52579164	52579425	-	XM_012182843.2	0	sense	genic	intronic	nested	LOC101117851	GeneID:101117851,Genbank:XM_012182843.2	cytochrome b5 reductase 4, transcript variant X2	GO:0004128,GO:0005783,GO:0016491,GO:0020037,GO:0046872	cytochrome-b5 reductase activity, acting on NAD(P)H|endoplasmic reticulum|oxidoreductase activity|heme binding|metal ion binding	ko00520	Amino sugar and nucleotide sugar metabolism
TCONS_00184229	477.645	0	955.289	Inf	Inf	0.00479077	0.538413	Up	0	148.552	Chr9	20043852	20044120	+	XM_015097651.1	0	sense	genic	intronic	nested	ZFAT	GeneID:101119913,Genbank:XM_015097651.1	zinc finger and AT-hook domain containing, transcript variant X1	GO:0001077,GO:0002244,GO:0003677,GO:0005634,GO:0005829,GO:0046872,GO:0060712	transcriptional activator activity, RNA polymerase II proximal promoter sequence-specific DNA binding|hematopoietic progenitor cell differentiation|DNA binding|nucleus|cytosol|metal ion binding|spongiotrophoblast layer development
TCONS_00184948	502.297	0	1004.59	Inf	Inf	0.00362157	0.449962	Up	0	132.425	Chr9	38919391	38919697	+	XM_012183740.2	0	sense	genic	intronic	nested	RAB2A	GeneID:101110853,Genbank:XM_012183740.2	RAB2A, member RAS oncogene family, transcript variant X1	GO:0000139,GO:0003924,GO:0005525,GO:0005634,GO:0005765,GO:0005789,GO:0005794,GO:0005829,GO:0006888,GO:0007030,GO:0015031,GO:0019003,GO:0033116,GO:0042470,GO:0043687,GO:0070062	Golgi membrane|GTPase activity|GTP binding|nucleus|lysosomal membrane|endoplasmic reticulum membrane|Golgi apparatus|cytosol|ER to Golgi vesicle-mediated transport|Golgi organization|protein transport|GDP binding|endoplasmic reticulum-Golgi intermediate compartment membrane|melanosome|post-translational protein modification|extracellular exosome	ko04152	AMPK signaling pathway
TCONS_00185485	344.256	0	688.513	Inf	Inf	0.0226343	1	Up	0	102.422	Chr9	59054310	59054927	+	XM_004011769.3	0	sense	genic	intronic	nested	EXT1	GeneID:101114877,Genbank:XM_004011769.3	exostosin glycosyltransferase 1, transcript variant X1	GO:0000139,GO:0001503,GO:0006024,GO:0006486,GO:0007369,GO:0007411,GO:0007492,GO:0007498,GO:0015014,GO:0021772,GO:0030176,GO:0042803,GO:0046872,GO:0046982,GO:0050508,GO:0050509,GO:0072498	Golgi membrane|ossification|glycosaminoglycan biosynthetic process|protein glycosylation|gastrulation|axon guidance|endoderm development|mesoderm development|heparan sulfate proteoglycan biosynthetic process, polysaccharide chain biosynthetic process|olfactory bulb development|integral component of endoplasmic reticulum membrane|protein homodimerization activity|metal ion binding|protein heterodi…	ko00534	Glycosaminoglycan biosynthesis - heparan sulfate / heparin
TCONS_00190053	344.256	0	688.513	Inf	Inf	0.0226343	1	Up	0	103.774	ChrX	6837380	6837948	+	XM_012106193.2	0	sense	genic	intronic	nested	TBL1X	GeneID:101119116,Genbank:XM_012106193.2	transducin (beta)-like 1X-linked, transcript variant X6	GO:0000122,GO:0003714,GO:0005634,GO:0005654,GO:0005876,GO:0006351,GO:0006508,GO:0007605,GO:0008013,GO:0008022,GO:0008134,GO:0016575,GO:0017053,GO:0019216,GO:0019904,GO:0042393,GO:0042802,GO:0043161,GO:0044212,GO:0045893,GO:0045944,GO:0090263	negative regulation of transcription from RNA polymerase II promoter|transcription corepressor activity|nucleus|nucleoplasm|spindle microtubule|transcription, DNA-templated|proteolysis|sensory perception of sound|beta-catenin binding|protein C-terminus binding|transcription factor binding|histone deacetylation|transcriptional repressor complex|regulation of lipid metabolic process|protein domain …	ko04013,ko04310	MAPK signaling pathway - fly|Wnt signaling pathway
TCONS_00190570	363.626	0	727.252	Inf	Inf	0.0179585	1	Up	2.93597e-45	109.675	ChrX	19116884	19117163	+	XM_012107753.1	0	sense	genic	intronic	nested	MBTPS2	GeneID:101106915,Genbank:XM_012107753.1	membrane bound transcription factor peptidase, site 2, transcript variant X1	GO:0004222,GO:0005737,GO:0008203,GO:0016021,GO:0031293,GO:0036500,GO:0046872,GO:0051091,GO:1990440	metalloendopeptidase activity|cytoplasm|cholesterol metabolic process|integral component of membrane|membrane protein intracellular domain proteolysis|ATF6-mediated unfolded protein response|metal ion binding|positive regulation of DNA binding transcription factor activity|positive regulation of transcription from RNA polymerase II promoter in response to endoplasmic reticulum stress	ko04141	Protein processing in endoplasmic reticulum
TCONS_00192099	350.419	0	700.839	Inf	Inf	0.0210266	1	Up	0	105.186	ChrX	71926713	71999034	+	XM_015104949.1	0	sense	genic	intronic	overlapping	LOC105605519	GeneID:105605519,Genbank:XM_015104949.1	uncharacterized LOC105605519, transcript variant X1	GO:0003964,GO:0006310,GO:0009036,GO:0032197,GO:0032199,GO:0046872,GO:0090305	RNA-directed DNA polymerase activity|DNA recombination|Type II site-specific deoxyribonuclease activity|transposition, RNA-mediated|reverse transcription involved in RNA-mediated transposition|metal ion binding|nucleic acid phosphodiester bond hydrolysis
TCONS_00194818	397.964	0	795.928	Inf	Inf	0.0122308	0.930764	Up	0	123.216	ChrX	21197262	21197511	-	XM_012106411.2	0	sense	genic	intronic	nested	APOO	GeneID:101113910,Genbank:XM_012106411.2	apolipoprotein O, transcript variant X4	GO:0000139,GO:0005576,GO:0005789,GO:0006869,GO:0031305,GO:0034361,GO:0034362,GO:0034364,GO:0042407,GO:0061617	Golgi membrane|extracellular region|endoplasmic reticulum membrane|lipid transport|integral component of mitochondrial inner membrane|very-low-density lipoprotein particle|low-density lipoprotein particle|high-density lipoprotein particle|cristae formation|MICOS complex
TCONS_00194970	317.843	0	635.686	Inf	Inf	0.0306248	1	Up	0	90.7461	ChrX	30336436	30336714	-	XM_012106459.2	0	sense	genic	intronic	nested	DMD	GeneID:101114682,Genbank:XM_012106459.2	dystrophin, transcript variant X7	GO:0002162,GO:0003779,GO:0005737,GO:0005856,GO:0008270,GO:0030054,GO:0042383,GO:0045211	dystroglycan binding|actin binding|cytoplasm|cytoskeleton|zinc ion binding|cell junction|sarcolemma|postsynaptic membrane
TCONS_00196413	740.459	0	1480.92	Inf	Inf	0.000380271	0.178084	Up	0.0326955	107.62	ChrX	62566072	62567542	-
TCONS_00005764	284.513	569.027	0	0	#NAME?	0.0381467	1	Down	61.4453	0	Chr1	170527279	170527600	+	XM_012189593.2	0	sense	genic	intronic	nested	BBX	GeneID:101115417,Genbank:XM_012189593.2	bobby sox homolog (Drosophila), transcript variant X7	GO:0003677,GO:0005654,GO:0005829,GO:0006351,GO:0006355,GO:0060348	DNA binding|nucleoplasm|cytosol|transcription, DNA-templated|regulation of transcription, DNA-templated|bone development
TCONS_00007091	352.66	705.32	0	0	#NAME?	0.0173607	1	Down	89.3055	0	Chr1	213744963	213745263	+	XM_004003153.3	0	sense	genic	intronic	nested	PLD1	GeneID:101114661,Genbank:XM_004003153.3	phospholipase D1, transcript variant X2			ko00564,ko04024,ko04144,ko00565,ko04072,ko04912,ko04014,ko04666,ko04071,ko04724	Glycerophospholipid metabolism|cAMP signaling pathway|Endocytosis|Ether lipid metabolism|Phospholipase D signaling pathway|GnRH signaling pathway|Ras signaling pathway|Fc gamma R-mediated phagocytosis|Sphingolipid signaling pathway|Glutamatergic synapse
TCONS_00011020	500.88	1001.76	0	0	#NAME?	0.00291707	0.403616	Down	128.637	0	Chr1	36572768	36573025	-	XM_015091672.1	0	sense	genic	intronic	nested	TM2D1	GeneID:101123085,Genbank:XM_015091672.1	TM2 domain containing 1, transcript variant X1	GO:0001540,GO:0004930,GO:0005654,GO:0005887,GO:0007186,GO:0097190	amyloid-beta binding|G-protein coupled receptor activity|nucleoplasm|integral component of plasma membrane|G-protein coupled receptor signaling pathway|apoptotic signaling pathway
TCONS_00014319	347.549	695.098	0	0	#NAME?	0.018502	1	Down	87.1711	0	Chr1	128712660	128712919	-	XM_015092385.1	0	sense	genic	intronic	nested	GABPA	GeneID:443478,Genbank:XM_015092385.1	GA binding protein transcription factor alpha subunit, transcript variant X1	GO:0000122,GO:0000790,GO:0000978,GO:0001077,GO:0001228,GO:0001701,GO:0003677,GO:0003682,GO:0003700,GO:0003713,GO:0005634,GO:0005654,GO:0006366,GO:0007005,GO:0010628,GO:0030154,GO:0033613,GO:0044212,GO:0045653,GO:0045944,GO:0046982,GO:1903351	negative regulation of transcription from RNA polymerase II promoter|nuclear chromatin|RNA polymerase II proximal promoter sequence-specific DNA binding|transcriptional activator activity, RNA polymerase II proximal promoter sequence-specific DNA binding|transcriptional activator activity, RNA polymerase II transcription regulatory region sequence-specific DNA binding|in utero embryonic developme…
TCONS_00014566	304.957	609.915	0	0	#NAME?	0.0304684	1	Down	66.5625	0	Chr1	138995180	138995492	-
TCONS_00015894	582.088	1164.18	0	0	#NAME?	0.00121392	0.288021	Down	146.801	0	Chr1	188410781	188411028	-	XM_012096124.2	0	sense	genic	intronic	nested	LRCH3	GeneID:101119355,Genbank:XM_012096124.2	leucine-rich repeats and calponin homology (CH) domain containing 3, transcript variant X4	GO:0005576,GO:0005829,GO:0005886,GO:0007165	extracellular region|cytosol|plasma membrane|signal transduction
TCONS_00016130	374.24	748.48	0	0	#NAME?	0.0133444	0.940326	Down	92.6556	0	Chr1	197098979	197099266	-	XM_015091790.1	0	sense	genic	intronic	nested	LPP	GeneID:101110107,Genbank:XM_015091790.1	LIM domain containing preferred translocation partner in lipoma, transcript variant X12			ko04391	Hippo signaling pathway - fly
TCONS_00017170	352.66	705.32	0	0	#NAME?	0.0173607	1	Down	79.1814	4.04205e-28	Chr1	224467673	224469819	-	XM_004003202.2	0	sense	genic	intronic	nested	PPM1L	GeneID:101105045,Genbank:XM_004003202.2	protein phosphatase, Mg2+/Mn2+ dependent 1L, transcript variant X1	GO:0000165,GO:0004722,GO:0005622,GO:0007178,GO:0016021,GO:0046872	MAPK cascade|protein serine/threonine phosphatase activity|intracellular|transmembrane receptor protein serine/threonine kinase signaling pathway|integral component of membrane|metal ion binding
TCONS_00021396	276.563	553.126	0	0	#NAME?	0.0416859	1	Down	63.6786	0	Chr10	2005026	2005326	-	XM_012184309.2	0	sense	genic	intronic	nested	TDRD3	GeneID:101104506,Genbank:XM_012184309.2	tudor domain containing 3, transcript variant X2	GO:0003682,GO:0003713,GO:0005634,GO:0005737,GO:0016569,GO:0035064	chromatin binding|transcription coactivator activity|nucleus|cytoplasm|covalent chromatin modification|methylated histone binding
TCONS_00022674	403.77	807.541	0	0	#NAME?	0.00950414	0.826588	Down	100.473	0	Chr10	46598379	46598690	-	XM_012184752.2	0	sense	genic	intronic	nested	DACH1	GeneID:101121866,Genbank:XM_012184752.2	dachshund family transcription factor 1, transcript variant X2	GO:0001075,GO:0001078,GO:0001967,GO:0003677,GO:0005634,GO:0005667,GO:0005737,GO:0007275,GO:0007585,GO:0008283,GO:0010944,GO:0030336,GO:0033262,GO:0045892,GO:0046545,GO:0048147,GO:0060244,GO:2000279	transcription factor activity, RNA polymerase II core promoter sequence-specific binding involved in preinitiation complex assembly|transcriptional repressor activity, RNA polymerase II proximal promoter sequence-specific DNA binding|suckling behavior|DNA binding|nucleus|transcription factor complex|cytoplasm|multicellular organism development|respiratory gaseous exchange|cell proliferation|negat…
TCONS_00022738	399.795	799.59	0	0	#NAME?	0.0099533	0.85346	Down	97.6827	0	Chr10	49392265	49392544	-	XM_012184772.2	0	sense	genic	intronic	nested	KLF12	GeneID:101122799,Genbank:XM_012184772.2	Kruppel-like factor 12, transcript variant X5	GO:0000122,GO:0003677,GO:0003700,GO:0003714,GO:0005654,GO:0005829,GO:0006351,GO:0006357,GO:0046872	negative regulation of transcription from RNA polymerase II promoter|DNA binding|DNA binding transcription factor activity|transcription corepressor activity|nucleoplasm|cytosol|transcription, DNA-templated|regulation of transcription from RNA polymerase II promoter|metal ion binding
TCONS_00028120	884.774	1769.55	0	0	#NAME?	7.08193e-05	0.0862296	Down	81.1867	0.00123844	Chr11	9044554	9143369	-	XM_015098462.1	0	sense	genic	intronic	overlapping	TEX14	GeneID:101102402,Genbank:XM_015098462.1	testis expressed 14, transcript variant X7	GO:0000776,GO:0000777,GO:0004672,GO:0005524,GO:0005623,GO:0005737,GO:0007094,GO:0007140,GO:0008608,GO:0019901,GO:0030496,GO:0032091,GO:0032466,GO:0043063,GO:0045171,GO:0051301,GO:0051306,GO:1990830	kinetochore|condensed chromosome kinetochore|protein kinase activity|ATP binding|cell|cytoplasm|mitotic spindle assembly checkpoint|male meiotic nuclear division|attachment of spindle microtubules to kinetochore|protein kinase binding|midbody|negative regulation of protein binding|negative regulation of cytokinesis|intercellular bridge organization|intercellular bridge|cell division|mitotic siste…
TCONS_00028136	417.968	835.935	0	0	#NAME?	0.00801318	0.717415	Down	89.5124	9.39098e-10	Chr11	9155919	9159431	-	XM_012185178.2	0	sense	genic	intronic	overlapping	TEX14	GeneID:101102402,Genbank:XM_012185178.2	testis expressed 14, transcript variant X1	GO:0000776,GO:0000777,GO:0004672,GO:0005524,GO:0005623,GO:0005737,GO:0007094,GO:0007140,GO:0008608,GO:0019901,GO:0030496,GO:0032091,GO:0032466,GO:0043063,GO:0045171,GO:0051301,GO:0051306,GO:1990830	kinetochore|condensed chromosome kinetochore|protein kinase activity|ATP binding|cell|cytoplasm|mitotic spindle assembly checkpoint|male meiotic nuclear division|attachment of spindle microtubules to kinetochore|protein kinase binding|midbody|negative regulation of protein binding|negative regulation of cytokinesis|intercellular bridge organization|intercellular bridge|cell division|mitotic siste…
TCONS_00039421	369.129	738.258	0	0	#NAME?	0.0141757	0.940326	Down	90.6364	0	Chr13	15714996	15715273	+	XM_004014186.3	0	sense	genic	intronic	nested	DHTKD1	GeneID:101117008,Genbank:XM_004014186.3	dehydrogenase E1 and transketolase domain containing 1, transcript variant X1	GO:0002244,GO:0004591,GO:0005739,GO:0005759,GO:0006091,GO:0006096,GO:0006099,GO:0030976,GO:0034641,GO:0045252	hematopoietic progenitor cell differentiation|oxoglutarate dehydrogenase (succinyl-transferring) activity|mitochondrion|mitochondrial matrix|generation of precursor metabolites and energy|glycolytic process|tricarboxylic acid cycle|thiamine pyrophosphate binding|cellular nitrogen compound metabolic process|oxoglutarate dehydrogenase complex
TCONS_00039972	374.24	748.48	0	0	#NAME?	0.0133444	0.940326	Down	89.4244	0	Chr13	31855624	31855881	+	XM_012188451.2	0	sense	genic	intronic	nested	CACNB2	GeneID:101112498,Genbank:XM_012188451.2	calcium channel, voltage-dependent, beta 2 subunit, transcript variant X1	GO:0005891,GO:0007268,GO:0007528,GO:0007601,GO:0008331,GO:0051015,GO:0051928,GO:0070509,GO:0086056,GO:0086091,GO:0098912,GO:1901385,GO:1990454	voltage-gated calcium channel complex|chemical synaptic transmission|neuromuscular junction development|visual perception|high voltage-gated calcium channel activity|actin filament binding|positive regulation of calcium ion transport|calcium ion import|voltage-gated calcium channel activity involved in AV node cell action potential|regulation of heart rate by cardiac conduction|membrane depolariz…	ko04010,ko04261,ko04921,ko04260	MAPK signaling pathway|Adrenergic signaling in cardiomyocytes|Oxytocin signaling pathway|Cardiac muscle contraction
TCONS_00052177	528.706	1057.41	0	0	#NAME?	0.002129	0.395168	Down	137.06	0	Chr14	46238879	46239155	-	XM_012190297.2	0	sense	genic	intronic	nested	ZNF568	GeneID:101107128,Genbank:XM_012190297.2	zinc finger protein 568, transcript variant X9	GO:0000122,GO:0000976,GO:0001701,GO:0003700,GO:0005634,GO:0006351,GO:0006355,GO:0045892,GO:0046872,GO:0060669	negative regulation of transcription from RNA polymerase II promoter|transcription regulatory region sequence-specific DNA binding|in utero embryonic development|DNA binding transcription factor activity|nucleus|transcription, DNA-templated|regulation of transcription, DNA-templated|negative regulation of transcription, DNA-templated|metal ion binding|embryonic placenta morphogenesis
TCONS_00052633	274.291	548.583	0	0	#NAME?	0.0427748	1	Down	66.1706	0	Chr14	51057173	51057480	-	XM_015100012.1	4227	antisense	intergenic	upstream	divergent	ZNF45	GeneID:101109474,Genbank:XM_015100012.1	zinc finger protein 45, transcript variant X2	GO:0003677,GO:0003700,GO:0005654,GO:0006355,GO:0006367,GO:0007275,GO:0046872	DNA binding|DNA binding transcription factor activity|nucleoplasm|regulation of transcription, DNA-templated|transcription initiation from RNA polymerase II promoter|multicellular organism development|metal ion binding
TCONS_00052637	515.077	1030.15	0	0	#NAME?	0.00247851	0.395168	Down	131.557	0	Chr14	51163896	51164231	-	XM_015100010.1	1610	sense	intergenic	downstream	same_strand	LOC105608474	GeneID:105608474,Genbank:XM_015100010.1	zinc finger protein 235, transcript variant X5	GO:0003677,GO:0003700,GO:0005634,GO:0006351,GO:0006355,GO:0046872	DNA binding|DNA binding transcription factor activity|nucleus|transcription, DNA-templated|regulation of transcription, DNA-templated|metal ion binding
TCONS_00061578	307.797	615.594	0	0	#NAME?	0.0295267	1	Down	6.56009	6.96596e-15	Chr16	64037253	64039922	+	XM_004017091.3	0	sense	genic	exonic	nested	SEMA5A	GeneID:101123150,Genbank:XM_004017091.3	sema domain, seven thrombospondin repeats (type 1 and type 1-like), transmembrane domain (TM) and short cytoplasmic domain, (semaphorin) 5A, transcript variant X4	GO:0001938,GO:0002043,GO:0005615,GO:0005886,GO:0007155,GO:0007162,GO:0007267,GO:0007399,GO:0007413,GO:0016020,GO:0016021,GO:0021536,GO:0030215,GO:0030836,GO:0035373,GO:0035413,GO:0038191,GO:0043395,GO:0045545,GO:0045766,GO:0048842,GO:0048843,GO:0050918,GO:0050919,GO:0051897,GO:0060326,GO:0070062,GO:1990256,GO:2000352,GO:2001028	positive regulation of endothelial cell proliferation|blood vessel endothelial cell proliferation involved in sprouting angiogenesis|extracellular space|plasma membrane|cell adhesion|negative regulation of cell adhesion|cell-cell signaling|nervous system development|axonal fasciculation|membrane|integral component of membrane|diencephalon development|semaphorin receptor binding|positive regulatio…	ko04360	Axon guidance
TCONS_00063770	789.936	1579.87	0	0	#NAME?	0.000171192	0.104221	Down	196.491	0	Chr17	542059	542333	+	XM_004017176.3	0	sense	genic	intronic	nested	CPE	GeneID:443028,Genbank:XM_004017176.3	carboxypeptidase E	GO:0003214,GO:0004181,GO:0004185,GO:0005615,GO:0005794,GO:0008270,GO:0016055,GO:0030070,GO:0030141,GO:0030658,GO:0042043,GO:0043025,GO:0050839,GO:0072657,GO:0097060	cardiac left ventricle morphogenesis|metallocarboxypeptidase activity|serine-type carboxypeptidase activity|extracellular space|Golgi apparatus|zinc ion binding|Wnt signaling pathway|insulin processing|secretory granule|transport vesicle membrane|neurexin family protein binding|neuronal cell body|cell adhesion molecule binding|protein localization to membrane|synaptic membrane
TCONS_00064138	358.907	717.814	0	0	#NAME?	0.0160608	0.992502	Down	86.987	0	Chr17	13014176	13014447	+	XM_004017223.3	6584	sense	intergenic	downstream	same_strand	ANAPC10	GeneID:101111128,Genbank:XM_004017223.3	anaphase promoting complex subunit 10, transcript variant X1			ko04914,ko04114,ko04110,ko04120,ko04111,ko04113	Progesterone-mediated oocyte maturation|Oocyte meiosis|Cell cycle|Ubiquitin mediated proteolysis|Cell cycle - yeast|Meiosis - yeast
TCONS_00065455	441.819	883.638	0	0	#NAME?	0.00593983	0.607024	Down	110.916	0	Chr17	52612662	52612920	+	XM_012097745.2	0	sense	genic	intronic	nested	CLIP1	GeneID:101121120,Genbank:XM_012097745.2	CAP-Gly domain containing linker protein 1, transcript variant X4	GO:0000278,GO:0000776,GO:0001578,GO:0001726,GO:0005635,GO:0005768,GO:0005813,GO:0005829,GO:0005874,GO:0005881,GO:0005882,GO:0007062,GO:0008017,GO:0008270,GO:0015630,GO:0015631,GO:0030659,GO:0031116,GO:0035371,GO:0042802,GO:0042803,GO:0044861,GO:0046872,GO:0051010	mitotic cell cycle|kinetochore|microtubule bundle formation|ruffle|nuclear envelope|endosome|centrosome|cytosol|microtubule|cytoplasmic microtubule|intermediate filament|sister chromatid cohesion|microtubule binding|zinc ion binding|microtubule cytoskeleton|tubulin binding|cytoplasmic vesicle membrane|positive regulation of microtubule polymerization|microtubule plus-end|identical protein binding…	ko04150	mTOR signaling pathway
TCONS_00082396	592.31	1184.62	0	0	#NAME?	0.00109511	0.288021	Down	152.724	0	Chr2	39980664	39980913	+	XM_012118924.2	0	sense	genic	intronic	nested	KCTD9	GeneID:101111427,Genbank:XM_012118924.2	potassium channel tetramerization domain containing 9, transcript variant X2	GO:0005622,GO:0016567,GO:0035556,GO:0042802,GO:0043621,GO:0051260,GO:0097602	intracellular|protein ubiquitination|intracellular signal transduction|identical protein binding|protein self-association|protein homooligomerization|cullin family protein binding
TCONS_00083943	340.167	680.333	0	0	#NAME?	0.0202717	1	Down	74.0426	0	Chr2	85132657	85132984	+	XM_015093231.1	0	sense	genic	intronic	nested	CNTLN	GeneID:101122503,Genbank:XM_015093231.1	centlein, transcript variant X1	GO:0005654,GO:0005737,GO:0005813,GO:0005814,GO:0005829,GO:0010457,GO:0019901,GO:0019904,GO:0030674,GO:0033365,GO:0070062	nucleoplasm|cytoplasm|centrosome|centriole|cytosol|centriole-centriole cohesion|protein kinase binding|protein domain specific binding|protein binding, bridging|protein localization to organelle|extracellular exosome
TCONS_00084141	681.469	1362.94	0	0	#NAME?	0.000485734	0.197143	Down	153.09	2.91331e-24	Chr2	92452313	92483285	+
TCONS_00085670	314.044	628.087	0	0	#NAME?	0.0275438	1	Down	80.6685	0	Chr2	142237331	142238666	+	XM_012135208.1	0	sense	genic	intronic	nested	SCN9A	GeneID:101122924,Genbank:XM_012135208.1	sodium channel, voltage gated, type IX alpha subunit, transcript variant X1	GO:0001518,GO:0005244,GO:0005248,GO:0005887,GO:0006954,GO:0019233,GO:0034765,GO:0035725,GO:0042995,GO:0048266	voltage-gated sodium channel complex|voltage-gated ion channel activity|voltage-gated sodium channel activity|integral component of plasma membrane|inflammatory response|sensory perception of pain|regulation of ion transmembrane transport|sodium ion transmembrane transport|cell projection|behavioral response to pain	ko04742	Taste transduction
TCONS_00087507	264.069	528.138	0	0	#NAME?	0.0481753	1	Down	64.5848	0	Chr2	204085849	204086117	+	XM_015093496.1	0	sense	genic	intronic	nested	NBEAL1	GeneID:101112883,Genbank:XM_015093496.1	neurobeachin like 1, transcript variant X7
TCONS_00091142	277.699	555.397	0	0	#NAME?	0.0411553	1	Down	72.0145	0	Chr2	36382288	36410252	-	XM_004004117.3	871	antisense	intergenic	downstream	convergent	FRMD3	GeneID:101119441,Genbank:XM_004004117.3	FERM domain containing 3, transcript variant X3	GO:0005200,GO:0005856,GO:0008092,GO:0016021,GO:0031032	structural constituent of cytoskeleton|cytoskeleton|cytoskeletal protein binding|integral component of membrane|actomyosin structure organization
TCONS_00105753	346.413	692.827	0	0	#NAME?	0.018765	1	Down	86.8621	0	Chr21	11882562	11883048	-	XM_015103078.1	0	sense	genic	intronic	nested	ANKRD42	GeneID:101106210,Genbank:XM_015103078.1	ankyrin repeat domain 42, transcript variant X1	GO:0005634,GO:0051059,GO:0051091,GO:0051092,GO:1900017	nucleus|NF-kappaB binding|positive regulation of DNA binding transcription factor activity|positive regulation of NF-kappaB transcription factor activity|positive regulation of cytokine production involved in inflammatory response
TCONS_00105990	268.612	537.225	0	0	#NAME?	0.0456743	1	Down	67.4476	0	Chr21	23722929	23723827	-	XM_012101766.2	0	sense	genic	intronic	nested	PRMT3	GeneID:101113707,Genbank:XM_012101766.2	protein arginine methyltransferase 3, transcript variant X3	GO:0003676,GO:0005737,GO:0005829,GO:0005840,GO:0006355,GO:0006479,GO:0008168,GO:0008469,GO:0016274,GO:0031397,GO:0035242,GO:0046872	nucleic acid binding|cytoplasm|cytosol|ribosome|regulation of transcription, DNA-templated|protein methylation|methyltransferase activity|histone-arginine N-methyltransferase activity|protein-arginine N-methyltransferase activity|negative regulation of protein ubiquitination|protein-arginine omega-N asymmetric methyltransferase activity|metal ion binding
TCONS_00107163	420.239	840.478	0	0	#NAME?	0.0077912	0.712192	Down	103.526	2.18427e-26	Chr21	43889608	43890154	-	XM_015103198.1	0	sense	genic	exonic	nested	RBM4B	GeneID:101117545,Genbank:XM_015103198.1	RNA binding motif protein 4B, transcript variant X3	GO:0003723,GO:0005654,GO:0005730,GO:0005829,GO:0006397,GO:0006417,GO:0007623,GO:0008270,GO:0008380,GO:0010628,GO:0032922,GO:0043153,GO:0043234	RNA binding|nucleoplasm|nucleolus|cytosol|mRNA processing|regulation of translation|circadian rhythm|zinc ion binding|RNA splicing|positive regulation of gene expression|circadian regulation of gene expression|entrainment of circadian clock by photoperiod|protein complex
TCONS_00109296	261.798	523.595	0	0	#NAME?	0.0494821	1	Down	67.4525	0	Chr22	49688621	49691820	+	XM_015103295.1	1937	sense	intergenic	upstream	same_strand	JAKMIP3	GeneID:101108708,Genbank:XM_015103295.1	Janus kinase and microtubule interacting protein 3, transcript variant X1	GO:0005794,GO:0008017,GO:0019900	Golgi apparatus|microtubule binding|kinase binding
TCONS_00113650	528.138	1056.28	0	0	#NAME?	0.00214235	0.395168	Down	133.801	0	Chr23	20342292	20342596	-	XM_015103591.1	0	sense	genic	intronic	nested	KIAA1328	GeneID:101115087,Genbank:XM_015103591.1	KIAA1328 ortholog, transcript variant X3
TCONS_00114903	329.377	658.753	0	0	#NAME?	0.0230997	1	Down	74.0483	0	Chr23	56125351	56125649	-	XM_015103778.1	0	sense	genic	intronic	nested	TXNL1	GeneID:101121817,Genbank:XM_015103778.1	thioredoxin like 1, transcript variant X1	GO:0000502,GO:0004791,GO:0005634,GO:0005737,GO:0005829,GO:0015035,GO:0015036,GO:0016671,GO:0034599,GO:0045454,GO:0047134,GO:0070062	proteasome complex|thioredoxin-disulfide reductase activity|nucleus|cytoplasm|cytosol|protein disulfide oxidoreductase activity|disulfide oxidoreductase activity|oxidoreductase activity, acting on a sulfur group of donors, disulfide as acceptor|cellular response to oxidative stress|cell redox homeostasis|protein-disulfide reductase activity|extracellular exosome
TCONS_00117853	264.637	529.274	0	0	#NAME?	0.0478544	1	Down	61.1354	0	Chr24	1775743	1776392	-	XM_004020718.3	8845	sense	intergenic	upstream	same_strand	RNPS1	GeneID:101115844,Genbank:XM_004020718.3	RNA binding protein S1, serine-rich domain, transcript variant X3	GO:0000184,GO:0000381,GO:0003723,GO:0005737,GO:0006397,GO:0008380,GO:0016607,GO:0043065,GO:0048025,GO:0061574	nuclear-transcribed mRNA catabolic process, nonsense-mediated decay|regulation of alternative mRNA splicing, via spliceosome|RNA binding|cytoplasm|mRNA processing|RNA splicing|nuclear speck|positive regulation of apoptotic process|negative regulation of mRNA splicing, via spliceosome|ASAP complex	ko03015,ko03013	mRNA surveillance pathway|RNA transport
TCONS_00124661	352.66	705.32	0	0	#NAME?	0.0173607	1	Down	90.5007	0	Chr26	26512473	26512774	+
TCONS_00127596	334.488	668.975	0	0	#NAME?	0.0217267	1	Down	81.7473	0	Chr3	10769524	10773290	+	XM_015093857.1	0	sense	genic	intronic	nested	SCAI	GeneID:101111873,Genbank:XM_015093857.1	suppressor of cancer cell invasion, transcript variant X1	GO:0003714,GO:0005634,GO:0005654,GO:0005737,GO:0006351,GO:0006355,GO:0016021,GO:0030336,GO:0031965,GO:0035024	transcription corepressor activity|nucleus|nucleoplasm|cytoplasm|transcription, DNA-templated|regulation of transcription, DNA-templated|integral component of membrane|negative regulation of cell migration|nuclear membrane|negative regulation of Rho protein signal transduction
TCONS_00129140	287.921	575.841	0	0	#NAME?	0.0367421	1	Down	59.1555	0	Chr3	46596526	46598125	+	XM_015094329.1	0	sense	genic	intronic	nested	USP34	GeneID:101120484,Genbank:XM_015094329.1	ubiquitin specific peptidase 34, transcript variant X1	GO:0004197,GO:0004843,GO:0005829,GO:0006511,GO:0016055,GO:0016579,GO:0036459,GO:0071108,GO:0090263	cysteine-type endopeptidase activity|thiol-dependent ubiquitin-specific protease activity|cytosol|ubiquitin-dependent protein catabolic process|Wnt signaling pathway|protein deubiquitination|thiol-dependent ubiquitinyl hydrolase activity|protein K48-linked deubiquitination|positive regulation of canonical Wnt signaling pathway
TCONS_00131558	302.118	604.236	0	0	#NAME?	0.0314381	1	Down	69.8295	0	Chr3	115970167	115970453	+	XM_012173985.2	0	sense	genic	intronic	nested	OTOGL	GeneID:101103553,Genbank:XM_012173985.2	otogelin-like, transcript variant X2	GO:0005576,GO:0007605,GO:0046373,GO:0046556	extracellular region|sensory perception of sound|L-arabinose metabolic process|alpha-L-arabinofuranosidase activity
TCONS_00137572	282.81	565.619	0	0	#NAME?	0.0388726	1	Down	56.7196	0	Chr3	29971018	29971356	-
TCONS_00141750	295.303	590.606	0	0	#NAME?	0.0338861	1	Down	67.4095	0	Chr3	146549494	146549787	-	XM_015093934.1	0	sense	genic	intronic	nested	LRRK2	GeneID:101111447,Genbank:XM_015093934.1	leucine-rich repeat kinase 2, transcript variant X1	GO:0000149,GO:0000165,GO:0000186,GO:0000187,GO:0001933,GO:0001934,GO:0003779,GO:0003924,GO:0004672,GO:0004674,GO:0004708,GO:0005096,GO:0005524,GO:0005525,GO:0005615,GO:0005622,GO:0005634,GO:0005737,GO:0005739,GO:0005741,GO:0005743,GO:0005759,GO:0005764,GO:0005768,GO:0005783,GO:0005794,GO:0005798,GO:0005802,GO:0005829,GO:0005886,GO:0005902,GO:0006468,GO:0006897,GO:0006914,GO:0006979,GO:0007005,GO:…	SNARE binding|MAPK cascade|activation of MAPKK activity|activation of MAPK activity|negative regulation of protein phosphorylation|positive regulation of protein phosphorylation|actin binding|GTPase activity|protein kinase activity|protein serine/threonine kinase activity|MAP kinase kinase activity|GTPase activator activity|ATP binding|GTP binding|extracellular space|intracellular|nucleus|cytopla…
TCONS_00143601	374.24	748.48	0	0	#NAME?	0.0133444	0.940326	Down	96.5914	0	Chr3	194651239	194761741	-
TCONS_00159317	273.723	547.447	0	0	#NAME?	0.0430531	1	Down	68.7346	0	Chr5	21587427	21587681	-	XM_015095667.1	0	sense	genic	intronic	nested	CHSY3	GeneID:101104485,Genbank:XM_015095667.1	chondroitin sulfate synthase 3, transcript variant X1			ko00532	Glycosaminoglycan biosynthesis - chondroitin sulfate / dermatan sulfate
TCONS_00159936	325.969	651.939	0	0	#NAME?	0.0240428	1	Down	81.811	0	Chr5	37151896	37152146	-	XM_012178331.2	0	sense	genic	intronic	nested	CLK4	GeneID:101104233,Genbank:XM_012178331.2	CDC like kinase 4, transcript variant X8	GO:0004674,GO:0004712,GO:0004713,GO:0005524,GO:0005634,GO:0018108,GO:0043484,GO:0046777	protein serine/threonine kinase activity|protein serine/threonine/tyrosine kinase activity|protein tyrosine kinase activity|ATP binding|nucleus|peptidyl-tyrosine phosphorylation|regulation of RNA splicing|protein autophosphorylation
TCONS_00163031	264.069	528.138	0	0	#NAME?	0.0481753	1	Down	45.224	0	Chr6	22081736	22082094	+	XM_012179604.2	0	sense	genic	exonic	nested	UBE2D3	GeneID:101107195,Genbank:XM_012179604.2	ubiquitin conjugating enzyme E2D 3, transcript variant X2	GO:0000209,GO:0004842,GO:0005524,GO:0005886,GO:0006281,GO:0006513,GO:0006915,GO:0010008,GO:0016567,GO:0043161,GO:0051865,GO:0061631,GO:0070936,GO:0070979,GO:1903955	protein polyubiquitination|ubiquitin-protein transferase activity|ATP binding|plasma membrane|DNA repair|protein monoubiquitination|apoptotic process|endosome membrane|protein ubiquitination|proteasome-mediated ubiquitin-dependent protein catabolic process|protein autoubiquitination|ubiquitin conjugating enzyme activity|protein K48-linked ubiquitination|protein K11-linked ubiquitination|positive …	ko04120,ko04141,ko04013	Ubiquitin mediated proteolysis|Protein processing in endoplasmic reticulum|MAPK signaling pathway - fly
TCONS_00163122	287.353	574.706	0	0	#NAME?	0.036972	1	Down	73.7196	0	Chr6	23765369	23765655	+	XM_015096395.1	0	sense	genic	intronic	nested	PPP3CA	GeneID:101122602,Genbank:XM_015096395.1	protein phosphatase 3, catalytic subunit, alpha isozyme, transcript variant X2	GO:0000082,GO:0005516,GO:0005654,GO:0005739,GO:0005829,GO:0005955,GO:0006470,GO:0006606,GO:0006816,GO:0014883,GO:0014898,GO:0016018,GO:0016311,GO:0019899,GO:0030018,GO:0033173,GO:0033192,GO:0033555,GO:0035562,GO:0035690,GO:0042383,GO:0045807,GO:0045944,GO:0046872,GO:0046983,GO:0048741,GO:0050774,GO:0050804,GO:0051091,GO:0051533,GO:0051592,GO:0060079,GO:0098794,GO:1903244,GO:1903799,GO:1905205	G1/S transition of mitotic cell cycle|calmodulin binding|nucleoplasm|mitochondrion|cytosol|calcineurin complex|protein dephosphorylation|protein import into nucleus|calcium ion transport|transition between fast and slow fiber|cardiac muscle hypertrophy in response to stress|cyclosporin A binding|dephosphorylation|enzyme binding|Z disc|calcineurin-NFAT signaling cascade|calmodulin-dependent protei…	ko04924,ko04360,ko04922,ko04660,ko04650,ko04728,ko04380,ko04724,ko04010,ko04114,ko04020,ko04370,ko04022,ko04720,ko04662,ko04310,ko04921	Renin secretion|Axon guidance|Glucagon signaling pathway|T cell receptor signaling pathway|Natural killer cell mediated cytotoxicity|Dopaminergic synapse|Osteoclast differentiation|Glutamatergic synapse|MAPK signaling pathway|Oocyte meiosis|Calcium signaling pathway|VEGF signaling pathway|cGMP-PKG signaling pathway|Long-term potentiation|B cell receptor signaling pathway|Wnt signaling pathway|Oxy…
TCONS_00163392	282.81	565.619	0	0	#NAME?	0.0388726	1	Down	69.109	0	Chr6	35796069	35796361	+	XM_004009708.3	0	sense	genic	intronic	nested	FAM13A	GeneID:101118358,Genbank:XM_004009708.3	family with sequence similarity 13 member A, transcript variant X1	GO:0005096,GO:0005829,GO:0007165,GO:0051056	GTPase activator activity|cytosol|signal transduction|regulation of small GTPase mediated signal transduction
TCONS_00163717	264.069	528.138	0	0	#NAME?	0.0481753	1	Down	60.305	0	Chr6	50042424	50042721	+	XM_015096433.1	0	sense	genic	intronic	nested	PCDH7	GeneID:101109016,Genbank:XM_015096433.1	protocadherin 7, transcript variant X1	GO:0002576,GO:0005509,GO:0005886,GO:0005887,GO:0007156,GO:0031092	platelet degranulation|calcium ion binding|plasma membrane|integral component of plasma membrane|homophilic cell adhesion via plasma membrane adhesion molecules|platelet alpha granule membrane
TCONS_00165909	274.859	549.718	0	0	#NAME?	0.042499	1	Down	46.9344	0	Chr6	12721467	12721821	-	XM_012179461.2	0	sense	genic	intronic	nested	ANK2	GeneID:101115623,Genbank:XM_012179461.2	ankyrin 2, neuronal, transcript variant X18
TCONS_00166787	274.291	548.583	0	0	#NAME?	0.0427748	1	Down	71.1034	0	Chr6	36509582	36509860	-	XM_012179695.2	0	sense	genic	intronic	nested	PKD2	GeneID:101103569,Genbank:XM_012179695.2	polycystic kidney disease 2 (autosomal dominant), transcript variant X1
TCONS_00168552	300.414	600.829	0	0	#NAME?	0.0320342	1	Down	70.6187	0	Chr6	97559983	97629925	-	XM_004009963.3	0	sense	genic	intronic	containing	HPSE	GeneID:101118612,Genbank:XM_004009963.3	heparanase, transcript variant X1	GO:0005578,GO:0005622,GO:0005634,GO:0005765,GO:0007155,GO:0030200,GO:0030305,GO:0060055	proteinaceous extracellular matrix|intracellular|nucleus|lysosomal membrane|cell adhesion|heparan sulfate proteoglycan catabolic process|heparanase activity|angiogenesis involved in wound healing	ko00531	Glycosaminoglycan degradation
TCONS_00172285	549.718	1099.44	0	0	#NAME?	0.00169708	0.382659	Down	142.423	0	Chr7	64694714	64694980	+	XM_004010666.3	0	sense	genic	intronic	nested	FBXO34	GeneID:101118956,Genbank:XM_004010666.3	F-box protein 34, transcript variant X2
TCONS_00173175	295.303	590.606	0	0	#NAME?	0.0338861	1	Down	64.7187	0	Chr7	82335252	82335563	+	XM_004010784.2	0	sense	genic	intronic	nested	LIN52	GeneID:101106081,Genbank:XM_004010784.2	lin-52 DREAM MuvB core complex component, transcript variant X1	GO:0005654,GO:0006351,GO:0007049,GO:0051726,GO:0070176	nucleoplasm|transcription, DNA-templated|cell cycle|regulation of cell cycle|DRM complex
TCONS_00173659	366.29	732.579	0	0	#NAME?	0.0146688	0.950037	Down	87.5309	1.81124e-21	Chr7	97285204	97333361	+	XM_012182201.2	0	sense	genic	intronic	overlapping	TTC8	GeneID:101114448,Genbank:XM_012182201.2	tetratricopeptide repeat domain 8, transcript variant X1	GO:0001103,GO:0001736,GO:0005813,GO:0005814,GO:0005929,GO:0007411,GO:0007608,GO:0015031,GO:0016020,GO:0021772,GO:0032391,GO:0032880,GO:0034260,GO:0034464,GO:0035264,GO:0036064,GO:0045444,GO:0048560,GO:0051492,GO:0060122,GO:0060170,GO:0060219,GO:0060271,GO:0061326,GO:0072659,GO:1903251,GO:1905515	RNA polymerase II repressing transcription factor binding|establishment of planar polarity|centrosome|centriole|cilium|axon guidance|sensory perception of smell|protein transport|membrane|olfactory bulb development|photoreceptor connecting cilium|regulation of protein localization|negative regulation of GTPase activity|BBSome|multicellular organism growth|ciliary basal body|fat cell differentiati…
TCONS_00173839	508.83	1017.66	0	0	#NAME?	0.00266128	0.395168	Down	131.24	0	Chr7	904892	905151	-	XM_015096769.1	0	sense	genic	intronic	nested	APC	GeneID:101104664,Genbank:XM_015096769.1	adenomatous polyposis coli, transcript variant X2			ko04390,ko04810,ko04310,ko04550	Hippo signaling pathway|Regulation of actin cytoskeleton|Wnt signaling pathway|Signaling pathways regulating pluripotency of stem cells
TCONS_00175687	471.917	943.835	0	0	#NAME?	0.0041099	0.494526	Down	122.261	0	Chr7	44254371	44254705	-	XM_012181409.1	0	sense	genic	intronic	nested	TLN2	GeneID:101112735,Genbank:XM_012181409.1	talin 2, transcript variant X3	GO:0001726,GO:0003779,GO:0005198,GO:0005200,GO:0005737,GO:0005886,GO:0005925,GO:0007016,GO:0007043,GO:0007155,GO:0015629,GO:0045202,GO:0051015	ruffle|actin binding|structural molecule activity|structural constituent of cytoskeleton|cytoplasm|plasma membrane|focal adhesion|cytoskeletal anchoring at plasma membrane|cell-cell junction assembly|cell adhesion|actin cytoskeleton|synapse|actin filament binding	ko04015,ko04510,ko04611	Rap1 signaling pathway|Focal adhesion|Platelet activation
TCONS_00177903	470.214	940.427	0	0	#NAME?	0.00419478	0.494526	Down	121.263	0	Chr8	13047050	13048040	+	XM_004011143.3	403	sense	intergenic	downstream	same_strand	HDDC2	GeneID:101118619,Genbank:XM_004011143.3	HD domain containing 2, transcript variant X1	GO:0005739	mitochondrion
TCONS_00178090	309.501	619.001	0	0	#NAME?	0.0289743	1	Down	62.4667	0	Chr8	19488625	19488964	+	XM_015097328.1	0	sense	genic	intronic	nested	CEP85L	GeneID:101103576,Genbank:XM_015097328.1	centrosomal protein 85kDa-like, transcript variant X1	GO:0005737,GO:0005813	cytoplasm|centrosome
TCONS_00189727	314.612	629.223	0	0	#NAME?	0.0273691	1	Down	75.8715	0	Chr9	94075650	94092659	-	XM_012184220.1	0	sense	genic	intronic	overlapping	MRPL13	GeneID:101121019,Genbank:XM_012184220.1	mitochondrial ribosomal protein L13, transcript variant X2	GO:0003729,GO:0003735,GO:0005743,GO:0005761,GO:0005762,GO:0005840,GO:0006412	mRNA binding|structural constituent of ribosome|mitochondrial inner membrane|mitochondrial ribosome|mitochondrial large ribosomal subunit|ribosome|translation	ko03010	Ribosome
TCONS_00193239	293.6	587.199	0	0	#NAME?	0.0345247	1	Down	71.3683	0	ChrX	108481616	108491810	+	XM_012107428.2	0	sense	genic	exonic	nested	ENOX2	GeneID:101104304,Genbank:XM_012107428.2	ecto-NOX disulfide-thiol exchanger 2, transcript variant X5	GO:0003676,GO:0005615,GO:0005829,GO:0007624,GO:0009897,GO:0015035,GO:0016049,GO:0040008,GO:0055114	nucleic acid binding|extracellular space|cytosol|ultradian rhythm|external side of plasma membrane|protein disulfide oxidoreductase activity|cell growth|regulation of growth|oxidation-reduction process
